# Alterations of human lung and gut microbiome in non-small cell lung carcinomas and distant metastasis

Hui Lu<sup>1#</sup>, Na L. Gao<sup>2#</sup>, Chunhua Wei<sup>1#</sup>, Jiaojiao Wang<sup>1</sup>, Fan Tong<sup>1</sup>, Huanhuan Li<sup>1</sup>, Ruiguang Zhang<sup>1</sup>, Hong Ma<sup>1</sup>, Nong Yang<sup>3</sup>, Yongchang Zhang<sup>3</sup>, Ye Wang<sup>1</sup>, Zhiwen Liang<sup>1</sup>, Hao Zeng<sup>1</sup>, Wei-Hua Chen<sup>2,4,5§</sup>, Xiaorong Dong<sup>1§</sup>

## Affiliations:

<sup>1</sup> Cancer Center, Union Hospital, Tongji Medical College, Huazhong University of Science and Technology, 430074 Wuhan, Hubei, China

<sup>2</sup> Key Laboratory of Molecular Biophysics of the Ministry of Education, Hubei Key Laboratory of Bioinformatics and Molecular-imaging, Department of Bioinformatics and Systems Biology, College of Life Science and Technology, Huazhong University of Science and Technology, 430074 Wuhan, Hubei, China

<sup>3</sup> Department of medical oncology, lung cancer and gastrointestinal unit, Hunan cancer hospital/The Affiliated Cancer Hospital of Xiangya School of Medicine, Central South University, Changsha, China, 410013

<sup>4</sup> Huazhong University of Science and Technology Ezhou Industrial Technology Research Institute, 436044 Ezhou, Hubei, China

<sup>5</sup> College of Life Science, HeNan Normal University, 453007 Xinxiang, Henan, China

# Contributed equally to this work

§ Correspondence should be addressed to Wei-Hua Chen ([weihuachen@hust.edu.cn](mailto:weihuachen@hust.edu.cn)) or Xiaorong Dong ([xiaorongdong@hust.edu.cn](mailto:xiaorongdong@hust.edu.cn)).

## 25 **Abstract**

### 26 **Background**

27 Non-small cell lung cancer (NSCLC) is the leading cause of cancer-related deaths  
28 worldwide. Although dysbiosis of lung and gut microbiota have been associated with  
29 NSCLC, their relative contributions are unclear; in addition, their roles in distant metastasis  
30 (DM) are still illusive.

### 31 **Results**

32 We surveyed the fecal and sputum (as a proxy for lung) microbiota in healthy controls and  
33 NSCLC patients of various stages, and found significant perturbations of gut- and sputum-  
34 microbiota in patients with NSCLC and DM. Machine-learning models combining both  
35 microbiota (mixed models) performed better than either dataset in patient stratification,  
36 with the highest area under the curve (AUC) value of 0.842. Sputum- microbiota  
37 contributed more than the gut in the mixed models; in addition, sputum-only models  
38 performed similarly to the mixed models in most cases. Several microbial-biomarkers were  
39 shared by both microbiota, indicating their similar roles at distinct body sites.  
40 Microbial-biomarkers of distinct disease stages were mostly shared, suggesting  
41 biomarkers for distant metastasis could be acquired early. Furthermore, *Pseudomonas*  
42 *aeruginosa*, a species previously associated with wound infections, was significantly more

43 abundant in brain metastasis, indicating distinct types of DMs could have different  
44 microbial-biomarkers.

#### 45 **Conclusion**

46 Our results indicate that alterations of sputum-microbiota have stronger relationships with  
47 NSCLC and distant metastasis than the gut, and strongly support the feasibility of  
48 metagenome-based non-invasive disease diagnosis and risk evaluation.

49

50 **Keywords:** gut microbiota, lung microbiota, machine learning, patient stratification,  
51 NSCLC, distant metastasis, brain metastasis

52

53

## 54 **Background**

55 Lung cancer (LC) is the leading cause of cancer-related deaths mortality worldwide, with  
56 non-small cell lung cancer (NSCLC) being the most common form of LC [1]. Despite the  
57 recent development of therapies for NSCLC, tumor metastasis is the main cause of  
58 recurrence and mortality in patients with NSCLC [1]. One of the key challenges is the low  
59 heritability of lung cancer susceptibility revealed by genetic studies: although numerous  
60 studies have established the important roles of somatic mutations as well as inheritable  
61 familial risks [2, 3], the genetic influence can only explain 3~15% of the heritability [4, 5],  
62 depending on the surveyed population.

63 Conversely, non-genetic factors, including life styles, environmental factors and lung  
64 and gut microbes are believed to contribute mostly to the disease. Especially, numerous  
65 recent studies have shown that both lung and gut microbiota are involved in the  
66 development of LC [6-8]. For example, researchers have used samples from  
67 bronchoalveolar fluid (BALF), tissues and spontaneous sputum of lung cancer patients for  
68 bacterial identification and microbiome characterization [7, 9-11]. When compared with  
69 healthy controls, researchers have identified certain lung or oral taxa, including  
70 *Streptococcus* and *Veillonella* were enriched in the patients, which might promote LC  
71 development through inflammation and/or unappreciated mechanisms [7, 12].

72 In addition, dysbiosis of gut microbiome has also been associated with many cancers  
73 [8, 13, 14], including LC [8]. A previous study suggested an increase in *Enterococcus* in the  
74 stool of patients with LC, compared with the stool of healthy subjects, and a decrease in  
75 *Bifidobacterium* and *Actinobacteria* [6], which others have shown that the response to  
76 immunotherapy (IO) in NSCLC patients is associated with changes of individual species  
77 such as *Alistipes putredinis*, *Bifidobacterium longum* and *Prevotella copri* as well as the  
78 overall diversity of the gut microbiome [7, 8]. Furthermore, increasing evidence have  
79 shown that the gut microbiome may play important roles in cancer by modulating  
80 inflammation [15], host immune response [16, 17] and directly interacting with therapeutic  
81 drugs [18].

82 Despite these significant advances, two important questions remain. First, it is still  
83 unclear which microbiota has stronger association with the development of NSCLC; the  
84 relative importance of local (i.e. lung-associated) versus gut microbiota has been recently  
85 discussed [19], but no direct evidence has been provided so far. Second, their alterations  
86 along with distant metastasis of NSCLC are yet to be characterized. To address these issues,  
87 we first conducted a comprehensive survey on both fecal and sputum (as a proxy for lung)  
88 microbiota in NSCLC patients of various stages, including stage IV patients suffered from  
89 distant metastasis (DM), and compared them with healthy controls of matching  
90 demographic and clinical characteristics. We then built mathematical models using the  
91 taxonomic profiles of both gut and sputum microbiota to test their ability to distinguish

92 patients of different disease stages and from healthy controls, and evaluate their relative  
93 contributions to the models.

## 94 **Results**

### 95 **Differential microbial diversity between sputum and gut microbiotas**

96 We enrolled in total 121 individuals who completed our study protocol (see Methods).  
97 Among which, 87 were newly diagnosed with NSCLC who had not previously received any  
98 anticancer therapy nor treated with any antibiotics, while 34 were healthy volunteers. We  
99 classified patients into distinct disease stages (i.e. from I to IV) according to the 8th  
100 American Joint Committee on Cancer (AJCC) guidelines [20]. All subjects currently lived in  
101 Hubei Province, China. As shown in Table 1, we found comparable demographic and  
102 clinical characteristics of these subjects between groups we were interested in. In this  
103 study, we used "Control", "NSCLC", "I\_III" and "DM" to refer healthy controls, patients of all  
104 stages, patients of stages I to III and patients with distal metastasis (DM, also referred as to  
105 stage IV), respectively.

106 We collected in total 30 sputum and 29 fecal samples from the healthy controls  
107 (Control) and 66 sputum and 85 fecal samples from the patients (NSCLC; see Figure 1A),  
108 and submitted them for 16S sequencing (see Methods). As shown in Figure 1 and  
109 Supplementary figure 1, we found that the microbial diversity, as measured by Shannon

110 index, was significantly higher in sputum than in gut in the healthy controls as well as  
111 different disease stage groups (Figure 1B left panel; Supplementary figure 1A-B; Wilcoxon  
112 rank-sum test). We also performed principal coordinate analysis (PCoA) based on  
113 Bray-Curtis distance at genus level to assess the beta diversity in microbial composition  
114 and found that the sputum microbiota were significantly different from the gut in healthy  
115 controls (Figure 1B right panel) and patients of different disease stages (Supplementary  
116 figure 1A-B). Together, our results suggested that sputum microbiota were significantly  
117 different from the gut microbiota and had significantly higher microbial diversity.

118

## 119 **Global alterations of sputum and fecal microbiotas in NSCLC patients of** 120 **different stages**

121 We next investigated the global alterations (i.e. dysbiosis) of sputum and gut microbiota in  
122 patients of different stages and between patients and healthy controls. As shown in Figure  
123 2A, in the sputum microbiota, we found significant lower alpha-diversities (Shannon Index,  
124 left panel; Richness Index, middle panel) in NSCLC than the Control group. We also found  
125 that significantly different beta-diversities between NSCLC and Control ( $P = 0.001$ ; Figure  
126 2B, left panel) and between I\_III and DM ( $P = 0.002$ ; Figure 2B, right panel). Thus, the  
127 dysbiosis of sputum microbiota was associated with both NSCLC and the distant  
128 metastasis (stage IV).

129           Conversely, in the gut microbiota, we did not find significant differences between  
130   NSCLC and Control (Figure 2C) in neither alpha-diversities nor beta-diversities (Figure 2D,  
131   left panel). However, we found significant beta-diversities between I\_III and DM patients ( $P$   
132   = 0.033; Figure 2D, right panel); in addition, the microbial composition of DM was  
133   significantly different from I\_III at genus level, with a decreasing evenness (Figure 2C, right  
134   panel). Together, the dysbiosis of the fecal microbiota was associated with distant  
135   metastasis, but not NSCLC.



136 **A significant proportion of microbial biomarkers was shared by sputum**  
137 **and gut microbiota**

138 We then searched for individual taxa that showed differential abundances between subject  
139 groups (also known as microbial biomarkers) using LEfSe analysis (Linear discriminant  
140 analysis Effect Size; see Methods for details), and summarized the results in Figure 3.

141 We first compared all NSCLC patients as a whole (i.e. from stages I to IV) with the  
142 healthy controls. We found a genus, *Filifactor* was significantly enriched in NSCLC sputum  
143 samples (Figure 3A, left panel). *Filifactor* belongs to Firmicutes and contains a few  
144 pathogenic species (e.g. *F. alocis*) that are associated with periodontal diseases and  
145 endodontic lesions [21, 22]. This results suggested that *Filifactor* either represented part of  
146 the oral microbiota from the sampling, or could thrive as pathogens in other body sites  
147 like many other oral microbes did (e.g. *Fusobacterium nucleatum*) [23, 24]. Conversely, we  
148 found that a few genera, including *Cardiobacterium*, *Deinococcus*, *Bacillus*, *Alloscardovia*  
149 and *Lactonifactor* were depleted in sputum sample of the NSCLC group (Figure 3A, left  
150 panel). These results confirmed that the normal sputum microbiome has been significantly  
151 altered, since many of these genera were known members of healthy oral and/or gut  
152 microbiota [25, 26]. In addition, we found that the genus *Neisseria* was enriched in healthy  
153 controls and *Succinispira* was enriched in NSCLC patients in gut (Figure 3A, right panel).

154 *Neisseria* belongs to the family *Neisseriaceae* and colonizes the mucosal surfaces of  
155 animals and contains a few known pathogenic species [27].

156 We next compared neighboring groups along the disease progression, i.e. Control  
157 versus I\_III and I\_III versus DM, in order to identify biomarker species for specific disease  
158 stages. We found that the *Cardiobacterium* was again identified to be enriched in  
159 Control as compared with I\_III (Figure 3B). In addition, we found a few biomarker species  
160 that were uniquely enriched in DM as compared with I\_III, including three genera from the  
161 family *Coriobacteriaceae* (such as *Atopobium*, *Eggerthella*, and *Olsenella*).  
162 *Coriobacteriaceae* is a group of gram-positive bacteria that are often nonmotile,  
163 nonspore-forming, nonhemolytic and strictly anaerobic [28]. They are normal dwellers of  
164 mammalian body habitats including the oral cavity [29], the gastrointestinal tract [30], and  
165 the genital tract [31]. Consistent to our results, several members of the genera, including  
166 *Atopobium*, *Eggerthella*, *Gordonibacter*, *Olsenella*, and *Paraeggerthella* had been  
167 implicated in the development of various clinical pathologies including abscesses [32],  
168 periodontitis [33], intestinal diseases and tumors [34, 35]. Surprisingly, we found two  
169 genera of the family *Coriobacteriaceae* were identified as gut-biomarkers (Figure 3C). For  
170 example, genus *Olsenella* was also enriched in fecal samples of the I\_III group as compared  
171 with the controls, while genus *Eggerthella* was also enriched the DM group as compared  
172 with I\_III. Together, our results suggested that a significant proportion of sputum- and

173 gut- microbial biomarkers were shared; the overlapping could be due to either extensive  
174 transmission from oral to other body sites [24], or the exposure to the same environment.

175

## 176 **The contributions of sputum and fecal microbiotas in patient stratification**

177 We next assessed the potential value of sputum and gut microbiota in patient stratification.

178 We generated predictive models using the Random forest algorithm implemented in

179 Siamcat [36], evaluated the model performance with 10-times cross-validation and

180 reported the averaged area under receiving operating characteristics curves values

181 (AUROCs or AUC for short; see Methods) from 1000 repeats. We first generated models

182 using the sputum and gut microbiota separately (referred to as sputum- and gut- models

183 respectively). As shown in Figure 4A-D and Table 2, we found that sputum microbiota

184 performed better than gut in patient stratification, in all subject group comparisons (Table

185 2).

186 We then built predictive models using both the sputum and fecal microbiome data as

187 input (referred to as mixed models below). Among the enrolled subjects, we identified in

188 total 91 subjects who had both sputum and fecal samples, among which 26, 27 and 38

189 were healthy controls, stage I\_III and DM patients respectively. As shown in Figure 4A-D

190 and Table 2, we found that the mixed model could perform either slightly better than or

191 comparable to that of the sputum (Table 2).

192 We then examined the top twenty genera ranked according to their importance to the  
193 mixed models. As shown in Figure 4 & Supplementary Figure 2, there were more  
194 sputum-derived genera than gut-derived genera in numbers. For example, only seven and  
195 three gut-derived genera were among the top twenty in the Control versus NSCLC (Figure  
196 4D) and Control versus I\_III (Figure 4E) models, respectively. More importantly, the  
197 sputum-derived genera in general ranked higher in the mixed models and had higher  
198 cumulative importance scores (Table 3).

199 Together, these results suggested that the sputum microbiota contributed more than  
200 the gut microbiota in patient stratification. In most cases, the sputum microbiota alone  
201 was sufficient for decent model performance.

202

### 203 **Top ranking taxa were also significantly shared by the sputum- and fecal-** 204 **machine-learning models**

205 We next checked if there were significant overlap in the top-ranking taxa between  
206 sputum- and fecal- models between controls and NSCLC; shared taxa often indicated that  
207 they may play similar roles at different body sites. As shown in Figure 5A-B, we found four  
208 of the top genera were shared at the same time in Control vs. NSCLC and Control vs. I\_III  
209 models, including *Macellibacteroides*, *Streptococcus*, *Clostridium* and *Bacteroides*.  
210 *Bacteroides* maintained a complex and generally beneficial relationship with the host

211 when retained in the gut, but when they escaped this environment they could cause  
212 significant pathology, including bacteremia and abscess formation in multiple body sites  
213 [37]. *Clostridium* were associated with a range of human diseases [38], and currently under  
214 investigation and testing as antitumor agents, because they germinated only in hypoxic  
215 tissues (i.e., tumor tissue), allowing precise targeting and direct killing of tumor cells [39].  
216 Five out of twenty genera (*Anaerostipes*, *Clostridium*, *Bacteroides*, *Actinomyces* and  
217 *Streptococcus*) were shared by sputum and gut models of I\_III vs. DM (Figure 5C). The  
218 human digestive tract was the main habitat for *Anaerostipes* [37]. There were several types  
219 of *Streptococcus*, two of which caused most of the strep infections in human: group A and  
220 group B [40]. These results indicated common features of sputum and gut dysbiosis during  
221 disease development and metastasis.

222 We also checked the overlapping of the top-ranking taxa in models between  
223 neighboring disease stages, such as models for Control vs. I\_III and I\_III vs. DM. Again, we  
224 found even more shared taxa. For example, we found seventeen out of the top twenty  
225 genera were shared in the two models generated using individual microbiota (Figure 5E-F).  
226 Unlike the sputum with more variety genera, there were two main families in gut,  
227 *Ruminococcaceae* and *Lachnospiraceae*, most members of which were found in human or  
228 animal digestive tract [41]. Previous studies have noted that both of them were depleted in  
229 patients with cirrhosis [42], enriched during alcohol abstinence and inversely correlated  
230 with intestinal permeability [43, 44]. These bacteria were known to have a beneficial effect

231 on gut barrier function [44]. Not surprisingly, we found that in the mixed models, in which  
232 the same taxa from sputum- and fecal- were treated as distinct features, several of the  
233 above-mentioned taxa from both sputum and feces were among the top twenty taxa,  
234 including *Streptococcus* in the Control vs. NSCLC models, *Anaerostinus*, *Bacteroides* and  
235 *Streptococcus* in the I\_III vs. DM models. Together, these results indicated that the same  
236 set of microbial taxa were underlying the development and progression of NSCLC, and the  
237 biomarkers for DM might be acquired early.

238

239 ***Pseudomonas aeruginosa*, a species implicated in infections, was enriched**  
240 **in brain-metastatic patients**

241 Brain-metastasis (BM) represented the deadliest form of distant metastasis of NSCLC. To  
242 identify putative microbial biomarkers that were capable of distinguishing BM from other  
243 types of distant metastasis, we divided stage IV patients into two groups, namely the BM  
244 group (18 sputum samples and 25 fecal samples) and nonBM group (21 sputum samples  
245 and 30 fecal samples) (Figure 6A, left panel). As shown in Figure 6A, in the sputum  
246 microbiota, we found significantly different beta-diversities ( $P=0.011$ ; middle panel)  
247 between the two groups, while there was no significant difference in fecal microbiota  
248 ( $P=0.178$ ; right panel). Thus, the dysbiosis of sputum microbiota was in stronger  
249 association with brain metastasis of NSCLC than fecal. We next performed LEfSe analysis

250 and Wilcoxon rank-sum test to identify potential microbial biomarkers between BM and  
251 nonBM groups (Figure 6B-C). Several differentially abundant genera were identified,  
252 including *Pseudomonas*, *Actinomyces* in sputum and *Blautia* and *Pseudomonas* in feces.  
253 *Pseudomonas* was highly abundant in the sputum of the BM group (~8.14%) but not  
254 detectable in the nonBM group with relative abundance close to zero (Figure 6B, right  
255 panel); *Pseudomonas* was also not detectable in any other disease stages nor in healthy  
256 controls. *Pseudomonas* was also significantly enriched in fecal samples of the BM group  
257 (with relative abundance of ~0.47%) and not detectable in other fecal samples.

258 We then generated the distinguishing BM and nonBM models using the sputum  
259 microbiota, gut microbiota and mixed microbiota separately. As shown in Figure 7A, we  
260 found that sputum microbiota performed best in BM and nonBM group comparison. We  
261 also examined the top-ranking taxa in sputum-, fecal- and mixed models. As shown in  
262 Supplementary Figure 3, there were more sputum-derived genera than gut-derived  
263 genera in numbers. Only three gut-derived genera were among the top twenty in the BM  
264 versus nonBM mixed model. Again, we found *Pseudomonas* was the most important  
265 genus to sputum- and mixed models between BM and nonBM (Figure 7B and  
266 Supplementary figure 3). Thus, *Pseudomonas* is a prominent biomarker for brain  
267 metastasis in sputum. *Pseudomonas* consists of a groups of aerobic, Gram-negative and  
268 rod-shaped bacteria [1] that are associated with many human diseases but are relatively  
269 rare in the healthy gut (see <https://gmrepo.humangut.info/species/286> for an overview

270 their prevalence and abundances in gut microbiota associated with human health and  
271 diseases [45]). According to a MAPseq tool [46], which assigns 16S sequencing reads to  
272 distinct taxa with confidence scores, most of the *Pseudomonas* reads could be reliably  
273 identified as *Pseudomonas aeruginosa* (see Methods for details). *P. aeruginosa* is one of  
274 the major causes of nosocomial infections worldwide [3] and is often associated with  
275 long-term wounds, pneumonia [4], chronic obstructive lung diseases [47], cystic fibrosis  
276 explanted lung [5], bronchiectasis [48] and chronic destroyed lung disease due to  
277 tuberculosis [47]. Its roles in brain metastasis needs to be further explored.

278

## 279 Discussion

280 We believed that the present study is the first to investigate the alterations of both sputum  
281 (as a proxy for lung) and gut microbiota on the development and metastasis of NSCLC.  
282 The results of our study suggest that lung microbiota may play major roles in the  
283 development of NSCLC, the dysbiosis of which could accurately stratify patients from  
284 healthy controls, while the distant metastasis (DM) was associated with both sputum and  
285 gut microbiota dysbiosis. We further identified a prominent microbial biomarker for brain  
286 metastasis (BM).

287 In recent years, growing evidence have linked the alterations in lung or gut microbiota  
288 to LC or NSCLC. However, the relative importance of the gut and lung microbiota to the



289 development of NSCLC are still unclear; in addition, their alterations along with DM of  
290 NSCLC have not been characterized. Therefore, in this study we assembled a cohort  
291 including patients of diagnosed NSCLC, including those suffered from DM (stage IV), and  
292 collected both sputum and fecal samples. We delineated the microbial community  
293 structure by 16S rRNA sequencing. The sputum and gut microbiota differed significantly in  
294 terms of alpha-diversity and beta-diversity, regardless health statuses and disease stages;  
295 surprisingly, sputum microbiota had significantly higher richness (taxon count) and  
296 evenness than gut microbiota, suggesting unappreciated microbial complexity in the  
297 respiratory systems and putative important roles in related diseases. We built machine  
298 learning models to evaluate the relative importance of sputum and gut microbiota in  
299 patient stratification. We found that both sputum and gut microbiota dysbiosis  
300 contributed significantly to discriminating metastatic to non-metastatic patients, while  
301 sputum microbiota performed the best in discriminating stage I\_III patients from healthy  
302 controls. These results highlighted the potentials using both sputum and gut microbiota in  
303 non-invasive disease diagnosis.

304 By comparing to healthy controls of matching demographic and clinical characteristics,  
305 we identified microbial biomarkers that showed significant abundance differences  
306 between subject groups. Not surprisingly, many of the identified biomarkers were either  
307 previously associated with other diseases [38, 40], or known to induce inflammation  
308 and/or interact with host immunity [31-38]. For example, the genera *Atopobium*,

309 *Eggerthella* and *Olsenell* (Figure 3C,F), belong to the family *Coriobacteriaceae*, had been  
310 implicated in the development of various clinical pathologies including abscesses [32],  
311 periodontitis [33], intestinal diseases and tumors [34, 35]; and that *Atopobium* was the  
312 third important genus to I\_III vs IV mixed model (Figure 4F). Similarly, a genus *Filifactor*,  
313 which was the most important genus in the Control vs NSCLC mixed model, was  
314 significantly enriched in NSCLC patients; it was known that some species of *Filifactor* were  
315 members of human oral microbiome and were pathogenic [21].

316 We found significant overlap between sputum- and fecal- biomarkers, suggesting that  
317 these microbes may play similar roles at different body sites. In addition, most of the  
318 microbial-biomarkers of distinct disease stages, i.e. I\_III vs. healthy controls and DM vs. I\_III,  
319 also overlapped (Figure 5); we found that the cumulative abundances of these biomarkers  
320 were increased (decreased) continuously along disease development. These results  
321 suggested that distant metastasis (DM) was the ultimatum development of lung cancer,  
322 and the DM-modulating microbes were acquired early.

323 We identified *Pseudomonas aeruginosa* as a prominent biomarker for brain  
324 metastasis (BM); *P. aeruginosa* was highly abundant in BM patients as compared with  
325 other NSCLC as well as other distant metastatic patients and was exclusively found in  
326 sputum. *P. aeruginosa* is found in many diseases and is often associated with long-term  
327 wounds; its role in BM should be further experimentally determined.

328        Despite the strengths of our study, there were two limitations. First, currently only  
329        limited numbers of subjects were enrolled, which could limit the predictive performance of  
330        our patient stratification models; better ML models would have been possible with more  
331        subjects and deeper coverage of metagenomics sequencing data. Second, the exact roles  
332        of gut and lung microbiota in NSCLC and metastasis needed to be further illustrated.  
333        Further experiments are needed to investigate their relative contributions by removing  
334        one at a time.

335

## 336        **Conclusions**

337        In summary, we surveyed both sputum (as a proxy for lung) and gut microbiota of patients  
338        with NSCLC and distant metastasis and compared them with healthy controls. We  
339        obtained mathematical models capable of distinguishing patients from healthy controls as  
340        well as patients at different disease stages with high performance. The top taxa ranked by  
341        these models could be used for future experiments to illustrate the underlying molecular  
342        mechanisms, and/or biomarkers for disease diagnosis. Our analyses revealed that the  
343        alterations of sputum (as a proxy to lung) microbiota have stronger association with  
344        NSCLC and distant metastasis than the gut, indicating that tumor-site associated  
345        microbiota may contribute more to disease development.

346

## 347 **Methods**

### 348 **Study design and sample collection**

349 NSCLC patients were recruited in the Cancer Center, Union Hospital, Tongji Medical  
350 College, Huazhong University of Science and Technology, China. Healthy relatives of these  
351 patients were recruited as healthy subjects. The criteria for selecting controls were as  
352 following: good physical status, no significant respiratory or alimentary conditions. NSCLC  
353 diagnosis was established according to histological criteria. Clinical stage of NSCLC was  
354 determined following the 8th American Joint Committee on Cancer (AJCC) guidelines [20];  
355 patients were classified into four distinct disease stages (i.e. from I to IV), in which stage  
356 IV referred to distant metastasis. No distant metastasis to any regions of the intestines  
357 was collected in this study.

358 The main exclusion criteria were as following: less than 18 years of age; any antibiotic  
359 therapy within the previous 1 month; known COPD (chronic obstructive pulmonary  
360 disease), pneumoconiosis, silicosis or any other diseases of the respiratory system; inability  
361 to give written informed consent. This study was approved by the Ethical Committees of  
362 the Cancer Center and registered with ClinicalTrials.gov (Identifier: NCT 03454685). All  
363 participants provided written informed consent before sample donation.

364 All fecal and spontaneous sputum samples were obtained after NSCLC diagnosis and  
365 before the patients received treatment. These samples were immediately placed in -80 °C.

366 Demographic and clinical data, including smoking status, gender, age, body mass index  
367 (BMI), disease stage and lung cancer pathology were obtained from each participant.

### 368 **DNA Extraction**

369 Bacterial DNA was extracted from the fecal and sputum samples using the OMEGA-soil  
370 DNA Kit (Omega Bio-Tek, USA) according to the manufacturer's instructions. The quality of  
371 DNA was measured using a NanoDrop 2000 Spectrophotometer (Thermo Scientific, USA).  
372 The quality of DNA was detected by 1% agarose gel electrophoresis. Bacterial DNA was  
373 immediately stored at -80 °C until further analysis.

### 374 **16S rRNA amplification and sequencing**

375 Bacterial DNA was isolated from fecal and sputum samples as previous described. DNA  
376 libraries covering the V3-V4 hypervariable regions of the bacterial 16S-rDNA gene were  
377 constructed using the FastPfu Polymerase (TransGen, China) according to the  
378 manufacturer's instructions. We used the primer set composed of 338F: 5' –  
379 ACTCCTACGGGAGGCAGCAG - 3', and 806R: 5' – GGACTACHVGGGTWTCTAAT - 3', which  
380 was designed to amplify the V3–V4 hypervariable region. All PCR products were purified  
381 with an AxyPrep DNA Gel Extraction Kit (Axygen Biosciences, USA) and quantified using a  
382 QuantiFluor™-ST (Promega, USA) according to the manufacturer's instructions. The  
383 sequencing of the PCR amplification products was performed on an Illumina Miseq

384 platform (Illumina, USA) by Majorbio Bio-Pharm Technology Co., Ltd. (Shanghai, China).  
385 Sequence data has been deposited to the NCBI SRA database under the NCBI bioproject  
386 ID PRJNA576323.

### 387 **Sequencing data analysis and taxonomic assignment**

388 Overall read quality was checked for each sample using FastQC. After Trimmomatic, reads  
389 with quality less than 30 or length less than 100 bp were removed from subsequent  
390 analysis. The filtered reads were then analyzed using Qiime2 (version 2018.11) [49]. DADA2  
391 software, wrapped in QIIME2, was used to filter the sequencing reads and construct  
392 feature table. The taxonomy classify database was downloaded from Qiime2  
393 (gg-13-8-99-515-806-nb-classifier.qza). Taxa with relative abundance less than 0.001 was  
394 removed. All analyses were carried out on genus level except for the alpha diversity. The  
395 taxonomy classify on species level was identified using "MAPseq" [46], which is a highly  
396 efficient approach with confidence estimates, for reference-based rRNA analysis; while  
397 also providing more accurate taxonomy classifications.

### 398 **Statistics analysis**

399 Patients' characteristics were expressed as mean  $\pm$  std. deviation and compared using X2  
400 tests or Independent-Samples T Test as appropriate. Statistical analyses were performed

401 using SPSS V.19.0 for Windows (Statistical Product and Service Solutions, Chicago, Illinois,  
402 USA).

403 The beta diversity analyses were performed using the R package “Vegan”. Principal  
404 coordinate analysis (PCoA) and adonis analysis were performed based on Bray-Curtis  
405 distance. Linear discriminant analysis effect size (LEfSe) analysis [50] and Wilcoxon  
406 rank-sum test [51] were used to identify differentially abundant genera between subject  
407 groups. R package “Siamcat” [36] was used for Random forest modeling and 10-fold cross  
408 validation with 100 times repeat. The operating characteristic curves (receiving operational  
409 curve, ROC) were constructed and area under curve (AUC) was calculated to assess the  
410 diagnostic performance of the model with the pROC package [52].

## 411 **Availability of data and materials**

412 Sequencing data is available and has been deposited to the NCBI SRA project under the  
413 NCBI BioProject ID PRJNA576323. Methods, including statements of data availability and  
414 additional references, are available at the publisher’s website.

415

## 416 **References**

- 417 1. Siegel RL, Miller KD, Jemal A: **Cancer statistics, 2018**. *CA Cancer J Clin* 2018,  
418 **68**:7-30.
- 419 2. Shen H, Zhu M, Wang C: **Precision oncology of lung cancer: genetic and genomic**  
420 **differences in Chinese population**. *NPJ Precis Oncol* 2019, **3**:14.
- 421 3. Li Y, Xiao X, Han Y, Gorlova O, Qian D, Leighl N, Johansen JS, Barnett M, Chen C,  
422 Goodman G, et al: **Genome-wide interaction study of smoking behavior and**  
423 **non-small cell lung cancer risk in Caucasian population**. *Carcinogenesis* 2018,  
424 **39**:336-346.
- 425 4. Czene K, Lichtenstein P, Hemminki K: **Environmental and heritable causes of**  
426 **cancer among 9.6 million individuals in the Swedish Family-Cancer Database**.  
427 *Int J Cancer* 2002, **99**:260-266.
- 428 5. Dai J, Shen W, Wen W, Chang J, Wang T, Chen H, Jin G, Ma H, Wu C, Li L, et al:  
429 **Estimation of heritability for nine common cancers using data from**  
430 **genome-wide association studies in Chinese population**. *Int J Cancer* 2017,  
431 **140**:329-336.
- 432 6. Zhuang H, Cheng L, Wang Y, Zhang YK, Zhao MF, Liang GD, Zhang MC, Li YG,  
433 Zhao JB, Gao YN, et al: **Dysbiosis of the Gut Microbiome in Lung Cancer**. *Front*  
434 *Cell Infect Microbiol* 2019, **9**:112.
- 435 7. Jin C, Lagoudas GK, Zhao C, Bullman S, Bhutkar A, Hu B, Ameh S, Sandel D, Liang  
436 XS, Mazzilli S, et al: **Commensal Microbiota Promote Lung Cancer Development**  
437 **via gammadelta T Cells**. *Cell* 2019, **176**:998-1013 e1016.
- 438 8. Jin Y, Dong H, Xia L, Yang Y, Zhu Y, Shen Y, Zheng H, Yao C, Wang Y, Lu S: **The**  
439 **Diversity of Gut Microbiome is Associated With Favorable Responses to**  
440 **Anti-Programmed Death 1 Immunotherapy in Chinese Patients With NSCLC**. *J*  
441 *Thorac Oncol* 2019.
- 442 9. Lee SH, Sung JY, Yong D, Chun J, Kim SY, Song JH, Chung KS, Kim EY, Jung JY,  
443 Kang YA, et al: **Characterization of microbiome in bronchoalveolar lavage fluid**  
444 **of patients with lung cancer comparing with benign mass like lesions**. *Lung*  
445 *Cancer* 2016, **102**:89-95.
- 446 10. Liu HX, Tao LL, Zhang J, Zhu YG, Zheng Y, Liu D, Zhou M, Ke H, Shi MM, Qu JM:  
447 **Difference of lower airway microbiome in bilateral protected specimen brush**  
448 **between lung cancer patients with unilateral lobar masses and control subjects**.  
449 *Int J Cancer* 2018, **142**:769-778.
- 450 11. Ren L, Zhang R, Rao J, Xiao Y, Zhang Z, Yang B, Cao D, Zhong H, Ning P, Shang Y,  
451 et al: **Transcriptionally Active Lung Microbiome and Its Association with**  
452 **Bacterial Biomass and Host Inflammatory Status**. *mSystems* 2018, **3**.
- 453 12. Tsay JJ, Wu BG, Badri MH, Clemente JC, Shen N, Meyn P, Li Y, Yie TA, Lhakhang  
454 T, Olsen E, et al: **Airway Microbiota Is Associated with Upregulation of the PI3K**  
455 **Pathway in Lung Cancer**. *Am J Respir Crit Care Med* 2018, **198**:1188-1198.
- 456 13. Matson V, Fessler J, Bao R, Chongsuwat T, Zha Y, Alegre ML, Luke JJ, Gajewski  
457 TF: **The commensal microbiome is associated with anti-PD-1 efficacy in**  
458 **metastatic melanoma patients**. *Science* 2018, **359**:104-108.



- 459 14. Santoni M, Piva F, Conti A, Santoni A, Cimadamore A, Scarpelli M, Battelli N,  
460 Montironi R: **Re: Gut Microbiome Influences Efficacy of PD-1-based**  
461 **Immunotherapy Against Epithelial Tumors.** *Eur Urol* 2018, **74**:521-522.
- 462 15. Grivennikov SI, Wang K, Mucida D, Stewart CA, Schnabl B, Jauch D, Taniguchi K,  
463 Yu GY, Osterreicher CH, Hung KE, et al: **Adenoma-linked barrier defects and**  
464 **microbial products drive IL-23/IL-17-mediated tumour growth.** *Nature* 2012,  
465 **491**:254-258.
- 466 16. Ma C, Han M, Heinrich B, Fu Q, Zhang Q, Sandhu M, Agdashian D, Terabe M,  
467 Berzofsky JA, Fako V, et al: **Gut microbiome-mediated bile acid metabolism**  
468 **regulates liver cancer via NKT cells.** *Science* 2018, **360**.
- 469 17. Cogdill AP, Gaudreau PO, Arora R, Gopalakrishnan V, Wargo JA: **The Impact of**  
470 **Intratumoral and Gastrointestinal Microbiota on Systemic Cancer Therapy.**  
471 *Trends Immunol* 2018, **39**:900-920.
- 472 18. Yu T, Guo F, Yu Y, Sun T, Ma D, Han J, Qian Y, Kryczek I, Sun D, Nagarsheth N, et  
473 al: **Fusobacterium nucleatum Promotes Chemoresistance to Colorectal Cancer**  
474 **by Modulating Autophagy.** *Cell* 2017, **170**:548-563 e516.
- 475 19. Dickson RP, Cox MJ: **Gut microbiota and protection from pneumococcal**  
476 **pneumonia.** *Gut* 2017, **66**:384.
- 477 20. Rami-Porta R, Asamura H, Travis WD, Rusch VW: **Lung cancer - major changes in**  
478 **the American Joint Committee on Cancer eighth edition cancer staging manual.**  
479 *CA Cancer J Clin* 2017, **67**:138-155.
- 480 21. A. S: **The Family Peptostreptococcaceae.** In: Rosenberg E., DeLong E.F., Lory S.,  
481 Stackebrandt E., Thompson F. (eds) *The Prokaryotes.* Springer 2014:pp 291-302.
- 482 22. Li H, Guan R, Sun J, Hou B: **Bacteria community study of combined**  
483 **periodontal-endodontic lesions using denaturing gradient gel electrophoresis and**  
484 **sequencing analysis.** *J Periodontol* 2014, **85**:1442-1449.
- 485 23. Wirbel J, Pyl PT, Kartal E, Zych K, Kashani A, Milanese A, Fleck JS, Voigt AY,  
486 Palleja A, Ponnudurai R, et al: **Meta-analysis of fecal metagenomes reveals global**  
487 **microbial signatures that are specific for colorectal cancer.** *Nat Med* 2019,  
488 **25**:679-689.
- 489 24. Schmidt TS, Hayward MR, Coelho LP, Li SS, Costea PI, Voigt AY, Wirbel J,  
490 Maistrenko OM, Alves RJ, Bergsten E, et al: **Extensive transmission of microbes**  
491 **along the gastrointestinal tract.** *Elife* 2019, **8**.
- 492 25. **Deinococcus.** <https://microbewikikenyonedu/index.php/Deinococcus> 2010.
- 493 26. Stenfors Arnesen LP, Fagerlund A, Granum PE: **From soil to gut: Bacillus cereus**  
494 **and its food poisoning toxins.** *FEMS Microbiol Rev* 2008, **32**:579-606.
- 495 27. W.Stratton JES: **Neisseria meningitidis.** In: **Molecular Medical Microbiology**  
496 **(Second Edition).** 2015, **3**:1729-1750.
- 497 28. Clavel T. LP, Charrier C. : **The Family Coriobacteriaceae.**In: Rosenberg E.,  
498 **DeLong E.F., Lory S., Stackebrandt E., Thompson F. (eds) The Prokaryotes.**  
499 *Springer* 2014:pp 201-238.
- 500 29. Poco SE, Jr., Nakazawa F, Ikeda T, Sato M, Sato T, Hoshino E: **Eubacterium**  
501 **exiguum sp. nov., isolated from human oral lesions.** *Int J Syst Bacteriol* 1996,  
502 **46**:1120-1124.
- 503 30. Kaltenpoth M, Winter SA, Kleinhammer A: **Localization and transmission route of**  
504 **Coriobacterium glomerans, the endosymbiont of pyrrhocorid bugs.** *FEMS*  
505 *Microbiol Ecol* 2009, **69**:373-383.
- 506 31. Lau SK, Woo PC, Fung AM, Chan KM, Woo GK, Yuen KY: **Anaerobic,**  
507 **non-sporulating, Gram-positive bacilli bacteraemia characterized by 16S rRNA**  
508 **gene sequencing.** *J Med Microbiol* 2004, **53**:1247-1253.

- 509 32. Kim KS, Rowlinson MC, Bennion R, Liu C, Talan D, Summanen P, Finegold SM: **Characterization of *Slackia exigua* isolated from human wound infections, including abscesses of intestinal origin.** *J Clin Microbiol* 2010, **48**:1070-1075.
- 510
- 511
- 512 33. Chavez de Paz LE, Molander A, Dahlen G: **Gram-positive rods prevailing in teeth with apical periodontitis undergoing root canal treatment.** *Int Endod J* 2004, **37**:579-587.
- 513
- 514
- 515 34. Marchesi JR, Dutilh BE, Hall N, Peters WH, Roelofs R, Boleij A, Tjalsma H: **Towards the human colorectal cancer microbiome.** *PLoS One* 2011, **6**:e20447.
- 516
- 517 35. Tjalsma H, Boleij A, Marchesi JR, Dutilh BE: **A bacterial driver-passenger model for colorectal cancer: beyond the usual suspects.** *Nat Rev Microbiol* 2012, **10**:575-582.
- 518
- 519
- 520 36. Zych K WJ, Essex M, Breuer K, Karcher N, Costea PI, Sunagawa S, Bork P, Zeller G: **SIAMCAT: Statistical Inference of Associations between Microbial Communities And host phenoTypes.** 2018.
- 521
- 522
- 523 37. Wexler HM: **Bacteroides: the good, the bad, and the nitty-gritty.** *Clin Microbiol Rev* 2007, **20**:593-621.
- 524
- 525 38. Kiu R, Caim S, Alcon-Giner C, Belteki G, Clarke P, Pickard D, Dougan G, Hall LJ: **Preterm Infant-Associated *Clostridium tertium*, *Clostridium cadaveris*, and *Clostridium paraputrificum* Strains: Genomic and Evolutionary Insights.** *Genome Biol Evol* 2017, **9**:2707-2714.
- 526
- 527
- 528
- 529 39. Durre P: **Physiology and Sporulation in *Clostridium*.** *Microbiol Spectr* 2014, **2**:TBS-0010-2012.
- 530
- 531 40. Seale AC, Baker CJ, Berkley JA, Madhi SA, Ordi J, Saha SK, Schrag SJ, Sobanjo-Ter Meulen A, Vekemans J: **Vaccines for maternal immunization against Group B *Streptococcus* disease: WHO perspectives on case ascertainment and case definitions.** *Vaccine* 2019.
- 532
- 533
- 534
- 535 41. E. S: **The Family Lachnospiraceae.** In: Rosenberg E., DeLong E.F., Lory S., Stackebrandt E., Thompson F. (eds) *The Prokaryotes.* Springer 2014:pp 197-201.
- 536
- 537 42. Chen Y, Yang F, Lu H, Wang B, Chen Y, Lei D, Wang Y, Zhu B, Li L: **Characterization of fecal microbial communities in patients with liver cirrhosis.** *Hepatology* 2011, **54**:562-572.
- 538
- 539
- 540 43. Leclercq S, De Saeger C, Delzenne N, de Timary P, Starkel P: **Role of inflammatory pathways, blood mononuclear cells, and gut-derived bacterial products in alcohol dependence.** *Biol Psychiatry* 2014, **76**:725-733.
- 541
- 542
- 543 44. Madsen K, Cornish A, Soper P, McKaigney C, Jijon H, Yachimec C, Doyle J, Jewell L, De Simone C: **Probiotic bacteria enhance murine and human intestinal epithelial barrier function.** *Gastroenterology* 2001, **121**:580-591.
- 544
- 545
- 546 45. Wu S, Sun C, Li Y, Wang T, Jia L, Lai S, Yang Y, Luo P, Dai D, Yang Y-Q, et al: **GMrepo: a database of curated and consistently annotated human gut metagenomes.** *Nucleic Acids Research* 2019.
- 547
- 548
- 549 46. Matias Rodrigues JF, Schmidt TSB, Tackmann J, von Mering C: **MAPseq: highly efficient k-mer search with confidence estimates, for rRNA sequence analysis.** *Bioinformatics* 2017, **33**:3808-3810.
- 550
- 551
- 552 47. Yum HK, Park IN, Shin BM, Choi SJ: **Recurrent *Pseudomonas aeruginosa* Infection in Chronic Lung Diseases: Relapse or Reinfection?** *Tuberc Respir Dis (Seoul)* 2014, **77**:172-177.
- 553
- 554
- 555 48. White L, Mirrani G, Grover M, Rollason J, Malin A, Suntharalingam J: **Outcomes of *Pseudomonas* eradication therapy in patients with non-cystic fibrosis bronchiectasis.** *Respir Med* 2012, **106**:356-360.
- 556
- 557

- 558 49. Hall M, Beiko RG: **16S rRNA Gene Analysis with QIIME2**. *Methods Mol Biol*  
559 2018, **1849**:113-129.  
560 50. Segata N, Izard J, Waldron L, Gevers D, Miropolsky L, Garrett WS, Huttenhower C:  
561 **Metagenomic biomarker discovery and explanation**. *Genome Biol* 2011, **12**:R60.  
562 51. Bauer DF: **Constructing confidence sets using rank statistics**. *Journal of the*  
563 *American Statistical Association* 1972:67, 687–690.  
564 52. Robin X, Turck N, Hainard A, Tiberti N, Lisacek F, Sanchez JC, Muller M: **pROC:**  
565 **an open-source package for R and S+ to analyze and compare ROC curves**. *BMC*  
566 *Bioinformatics* 2011, **12**:77.  
567

## 568 **Acknowledgements**

569 We are grateful for all the subjects who participated in the study.

## 570 **Funding**

571 This work was partly supported by National Natural Science Foundation of China  
572 (81573090, 81773233, 61932008, 61772368, 61572363), National Key R&D Program of  
573 China (2018YFC0910500), Natural Science Foundation of Shanghai (17ZR1445600),  
574 Shanghai Municipal Science and Technology Major Project (2018SHZDZX01) and ZJLab.

575

## 576 **Author information**

577 Hui Lu, Na L. Gao and Chunhua Wei contributed equally to this work.

578

## 579 **Affiliations**

580 *Cancer Center, Union Hospital, Tongji Medical College, Huazhong University of*  
581 *Science and Technology, 430074 Wuhan, Hubei, China*

582 Hui Lu, Chunhua Wei, Fan Tong, Jiaojiao Wang, Huanhuan Li, Ruiguang Zhang, Hong

583 Ma, Ye Wang, Zhiwen Liang, Hao Zeng & Xiaorong Dong

584 *Key Laboratory of Molecular Biophysics of the Ministry of Education, Hubei Key*

585 *Laboratory of Bioinformatics and Molecular-imaging, Department of Bioinformatics*

586 *and Systems Biology, College of Life Science and Technology, Huazhong University of*

587 *Science and Technology, 430074 Wuhan, Hubei, China*

588 Na L. Gao & Wei-Hua Chen

589 *Department of medical oncology, lung cancer and gastrointestinal unit, Hunan cancer*

590 *hospital/The Affiliated Cancer Hospital of Xiangya School of Medicine, Central South*

591 *University, Changsha, China, 410013*

592 Nong Yang & Yongchang Zhang

593 *Huazhong University of Science and Technology Ezhou Industrial Technology*

594 *Research Institute, 436044 Ezhou, Hubei, China*

595 Wei-Hua Chen

596 *College of Life Science, HeNan Normal University, 453007 Xinxiang, Henan, China*

597 Wei-Hua Chen

598 **Contributions**

599 W.H.C. and X.R.D. designed the study. X.R.D., W.H.C., H.L., N.L.G. and C.H.W. designed the

600 experiments. H.H.L., R.G.Z., H.M., N.Y., Y.C.Z., Y.W., and Z.W.L collected samples. H.L.,

601 C,H.W., J.J.W and F.T. performed the 16S-seq and clinical data. N.L.G. and H.Z. analyzed the

602 sequencing data and performed statistical analyses. X.R.D, W.H.C., N.L.G. H.L. and C.H.W.

603 wrote the manuscript with all authors contributing to the writing and providing feedbacks.

604 All authors read and approved the final version of the manuscript.

### 605 **Corresponding authors**

606 Correspondence should be addressed to Wei-Hua Chen ([weihuachen@hust.edu.cn](mailto:weihuachen@hust.edu.cn)) or

607 Xiaorong Dong ([xiaorongdong@hust.edu.cn](mailto:xiaorongdong@hust.edu.cn)).

## 608 **Ethics declarations**

### 609 **Ethics approval and consent to participate**

610 This study was approved by the Ethical Committees of the Cancer Center and registered

611 with ClinicalTrials.gov (Identifier: NCT 03454685); Cancer Center, Union Hospital, Tongji

612 Medical College, Huazhong University of Science and Technology (2018-S271).

### 613 **Consent for publication**

614 Not applicable.

### 615 **Competing interests**

616 The authors declare that they have no competing interests..

## 617 **Additional information**

618 Correspondence and requests for materials should be addressed to Wei-Hua Chen

619 ([weihuachen@hust.edu.cn](mailto:weihuachen@hust.edu.cn)) and Xiaorong Dong ([xiaorongdong@hust.edu.cn](mailto:xiaorongdong@hust.edu.cn)).

620

621 **Figure 1. Sputum and gut microbiota differed significantly in terms of alpha- and**  
622 **beta-diversities. (A)** Numbers of sputum (red) and gut (blue) samples collected in this  
623 study and their distributions in healthy controls and distinct disease stage groups. CON:  
624 healthy controls; I\_III: patients with stages of I to III; DM: patients with distant metastasis  
625 (also referred to as stage IV). Disease stages were assigned according to the 8th American  
626 Joint Committee on Cancer (AJCC) guidelines [20]. **(B)** Comparisons of alpha-diversity and  
627 beta-diversity between sputum with gut in healthy controls. Shannon diversity index  
628 (alpha-diversity; left panel) was significantly lower in fecal; principal coordinate analysis  
629 (PCoA; right panel) based on Bray-Curtis distance at genus level showed that the overall  
630 microbiota composition was different between fecal and sputum samples. Wilcoxon rank  
631 sum tests were used to compare between groups. Level of significance: \*\*\*  $P < 0.001$ ; \*\*  
632  $P < 0.01$ ; \*  $P < 0.05$ ; NS.  $P \geq 0.05$ . **(C)** Comparisons of alpha-diversity (left panel) and  
633 beta-diversity (right panel) between sputum with gut in NSCLC patients (stages I to IV).  
634

635 **Figure 2. Global alteration of sputum microbiota was associated with NSCLC and**  
636 **distant metastasis (A-B), while fecal microbiota was only significantly associated with**  
637 **the latter (C-D). (A)** Alpha diversity of sputum dysbiosis in pairwise comparisons. Shannon  
638 index (left); Evenness index (middle); Richness index (right). Shannon index and Richness  
639 index were significantly lower in patients as compared with controls; no significance was  
640 found in Evenness index. Wilcoxon rank sum test was used to compare between groups.

641 Level of significance: \*\*\*  $P < 0.001$ ; \*\*  $P < 0.01$ ; \*  $P < 0.05$ ; NS.  $P \geq 0.05$ . **(B)** Significant  
642 differences were found in beta-diversity between controls and NSCLC (left), as well as  
643 between controls vs I\_III (middle) and I\_III vs DM (right), indicating that dysbiosis of  
644 sputum microbiota was associated with lung cancer development and metastasis.  
645 Conversely, applying similar analyses to fecal samples, no alpha-diversities **(C)** but the  
646 beta-diversity in I\_III compared with DM **(D)** was significantly different, suggesting that  
647 fecal microbiota dysbiosis was associated with distal metastasis, but not NSCLC.

648

649 **Figure 3. Shared and distinct microbial biomarkers between subject groups in sputum**  
650 **and feces microbiota.** Differentially abundant microbial biomarkers between subject  
651 groups were identified using LEfSe analyses. **(A)** The relative abundance of 6 and 2 genera  
652 was significantly different between NSCLC and control group in sputum (left) and fecal  
653 (right), respectively. In order to identify biomarker for specific disease stages, we  
654 compared neighboring groups along the disease progression in sputum **(B)** and fecal **(C)**.  
655 Control versus I\_III, left; I\_III versus DM, right.

656

657 **Figure 4. Disease classification based on taxonomic profiles of sputum, gut and both.**  
658 Panels A to D showed the classification performance using relative abundance of genera  
659 as area under the ROC between subject groups. **(A)** Control vs NSCLC, **(B)** Control vs I\_III,  
660 **(C)** I\_III vs DM and **(D)** Control vs DM. Panels E to F showed the top twenty genera

661 important to the mixed models; they were ranked by the median values of 1000 repeats,  
662 therefore boxplots were used here to demonstrate the medians and distributions of these  
663 values. **(E)** Control vs NSCLC and **(F)** I\_III vs DM. Red boxes: sputum-derived genera; blue  
664 boxes: gut-derived genera. The colorful genera names indicated the overlap genera  
665 between sputum with gut. Star demonstrated the genus was significantly different in  
666 abundance using LEfSe analysis.

667

668 **Figure 5. Top-ranking genera in the machine learning models were significantly**  
669 **overlapped.** The Venn diagram showed the overlap of the top 20 genera between sputum  
670 with gut in **(A)** Control vs NSCLC classification model, **(B)** Control vs I\_III classification  
671 model and **(C)** I\_III vs DM classification model. The Venn diagram showed the overlap of  
672 top 20 genera **(D)** between sputum classification models and **(E)** between fecal  
673 classification models.

674

675 **Figure 6. Patients with brain metastasis differed significantly from other distant**  
676 **metastasis in microbial profiles of sputum and feces.** **(A)** Numbers of sputum (red) and  
677 gut (blue) brain metastasis samples (left). BM: NSCLC patients in stage IV with brain  
678 metastasis, nonBM: stage IV NSCLC patients without brain metastasis. PCoA analysis  
679 showed differences on beta-diversity between BM and nonBM in sputum (middle) not gut  
680 (right). LEfSe (left) analysis and Wilcoxon rank-sum test (right) of differentially abundant



681 microbial biomarkers between BM and nonBM in sputum (**B**) and gut (**C**). Level of  
682 significance: \*\*\*  $P < 0.001$ ; \*\*  $P < 0.01$ ; \*  $P < 0.05$ ; NS.  $P \geq 0.05$ . Star demonstrated the genus  
683 *Pseudomonas* was significantly different in abundance.

684

685

686

687 **Table 1. Clinical characteristics of healthy subjects and NSCLC patients.**

|                               | Sputum                |                           |                          |                                                 | Fecal             |                           |                    |                                              |                             |  |
|-------------------------------|-----------------------|---------------------------|--------------------------|-------------------------------------------------|-------------------|---------------------------|--------------------|----------------------------------------------|-----------------------------|--|
|                               | Health<br>y<br>n = 30 | Stage<br>I -III<br>n = 27 | Stage<br>IV<br>n =<br>39 | <i>P</i> value<br>Healthy vs<br>Stage<br>I -III | Healthy<br>n = 29 | Stage<br>I -III<br>n = 30 | Stage IV<br>n = 55 | <i>P</i> value<br>Healthy vs<br>Stage I -III | Stage I -III<br>vs Stage IV |  |
| <b>Age (years)</b>            |                       |                           |                          |                                                 |                   |                           |                    |                                              |                             |  |
| Mean ± Std.<br>Deviation      | 54.67<br>±<br>12.46   | 59.44<br>±<br>6.807       | 58.31<br>±<br>7.79       | 0.075                                           | 55.83 ±<br>12.04  | 59.17 ±<br>6.69           | 58.36 ±<br>8.292   | 0.197                                        | 0.650                       |  |
| <b>Gender</b>                 |                       |                           |                          |                                                 |                   |                           |                    |                                              |                             |  |
| male, n (%)                   | 17<br>(56.67%)        | 18<br>(66.67%)            | 29<br>(74.36%)           | 0.587                                           | 15<br>(51.72%)    | 19<br>(63.33%)            | 37<br>(67.27%)     | 0.435                                        | 0.812                       |  |
| female, n (%)                 | 13<br>(43.33%)        | 9<br>(33.33%)             | 10<br>(25.64%)           | 0.584                                           | 14<br>(48.28%)    | 11<br>(36.67%)            | 18<br>(32.73%)     |                                              |                             |  |
| <b>BMI (kg/m<sup>2</sup>)</b> |                       |                           |                          |                                                 |                   |                           |                    |                                              |                             |  |
| Mean ± Std.<br>Deviation      | 22.34<br>± 2.52       | 23.74<br>± 3.80           | 22.13<br>±<br>3.446      | 0.107                                           | 22.28 ±<br>2.38   | 23.58 ±<br>3.92           | 22.16 ±<br>3.161   | 0.141                                        | 0.061                       |  |
| <b>Smoking status</b>         |                       |                           |                          |                                                 |                   |                           |                    |                                              |                             |  |

|               |         |         |        |       |       |  |         |  |       |       |
|---------------|---------|---------|--------|-------|-------|--|---------|--|-------|-------|
|               | 14      | 14      | 23     |       |       |  | 15      |  |       |       |
| Smoker, n (%) | ( 46.67 | ( 51.85 | ( 58.9 |       |       |  | ( 50.00 |  |       |       |
|               | %)      | %)      | 7%)    |       |       |  | %)      |  |       |       |
|               |         |         |        | 0.793 | 0.620 |  |         |  | 0.604 | 0.244 |
| Non-smoker, n | 16      | 13      | 16     |       |       |  | 15      |  |       |       |
| (%)           | ( 53.33 | ( 48.15 | ( 41.0 |       |       |  | ( 50.00 |  |       |       |
|               | %)      | %)      | 3%)    |       |       |  | %)      |  |       |       |

Disease stage

|                  |   |         |        |   |   |   |         |           |   |   |
|------------------|---|---------|--------|---|---|---|---------|-----------|---|---|
|                  |   | 9       |        |   |   |   | 11      |           |   |   |
| Stage I, n (%)   | - | ( 33.33 | 0      | - | - | - | ( 36.7% | 0         | - | - |
|                  |   | %)      |        |   |   |   | )       |           |   |   |
|                  |   | 7       |        |   |   |   | 7       |           |   |   |
| Stage II, n (%)  | - | ( 25.93 | 0      | - | - | - | ( 23.3% | 0         | - | - |
|                  |   | %)      |        |   |   |   | )       |           |   |   |
|                  |   | 11      |        |   |   |   | 12      |           |   |   |
| Stage III, n (%) | - | ( 40.74 | 0      | - | - | - | ( 40.0% | 0         | - | - |
|                  |   | %)      |        |   |   |   | )       |           |   |   |
|                  |   | 39      |        |   |   |   | 55      |           |   |   |
| Stage IV, n (%)  | - | 0       | ( 100. | - | - | - | 0       | ( 100.00% | - | - |
|                  |   |         | 00%)   |   |   |   |         | )         |   |   |

Lung cancer

pathology

|                   |   |         |        |   |   |   |         |            |   |   |
|-------------------|---|---------|--------|---|---|---|---------|------------|---|---|
|                   |   | 19      | 26     |   |   |   | 22      |            |   |   |
| Adenocarcinoma, n | - | ( 70.37 | ( 66.7 | - | - | - | ( 73.3% | 40         | - | - |
| (%)               |   | %)      | %)     |   |   |   | )       | ( 72.73%)  |   |   |
|                   |   | 6       | 9      |   |   |   | 6       |            |   |   |
| Squamous cell     | - | ( 22.22 | ( 23.1 | - | - | - | ( 20.0% | 12         | - | - |
| carcinoma, n (%)  |   | %)      | %)     |   |   |   | )       | ( 21.82%)  |   |   |
|                   |   | 2       | 4      |   |   |   | 2       | 3 ( 5.45%) | - | - |
| Non-small cell    | - |         |        | - | - | - |         |            |   |   |

|                    |        |        |          |
|--------------------|--------|--------|----------|
| carcinoma, n ( % ) | ( 7.41 | ( 10.3 | ( 6.7% ) |
|                    | % )    | % )    |          |

---

688

689 Statistically differences were calculated by Independent-Samples T Tests for continuous data and X<sup>2</sup> tests for count

690 data

**Table 2. The AUC values of classifying models.**

|              | Control vs. NSCLC     | Control vs. I_III     | I_III vs. DM          | Control vs. DM        |
|--------------|-----------------------|-----------------------|-----------------------|-----------------------|
| Sputum       | 0.778 (0.673 - 0.883) | 0.842 (0.736 - 0.947) | 0.740 (0.618 - 0.862) | 0.791 (0.679 - 0.904) |
| Fecal        | 0.632 (0.514 - 0.750) | 0.607 (0.458 - 0.756) | 0.707 (0.594 - 0.820) | 0.723 (0.608 - 0.838) |
| Sputum+Fecal | 0.779 (0.666 - 0.893) | 0.839 (0.730 - 0.948) | 0.756 (0.637 - 0.876) | 0.783 (0.661 - 0.905) |

**Table 3. The sum of cumulative importance scores in mixed models.**

|        | Control vs. NSCLC      | Control vs. I_III      | I_III vs. DM          | Control vs. DM        |
|--------|------------------------|------------------------|-----------------------|-----------------------|
| Sputum | 8.030 (6.034 – 11.422) | 7.586 (5.235 – 10.690) | 7.230 (5.066 – 8.969) | 6.420 (5.416– 8.797)  |
| Fecal  | 3.277 (2.639 – 4.466)  | 0.912 (0.618 – 1.366)  | 4.599 (3.140 – 5.964) | 0.723 (0.608 - 0.838) |

**A**

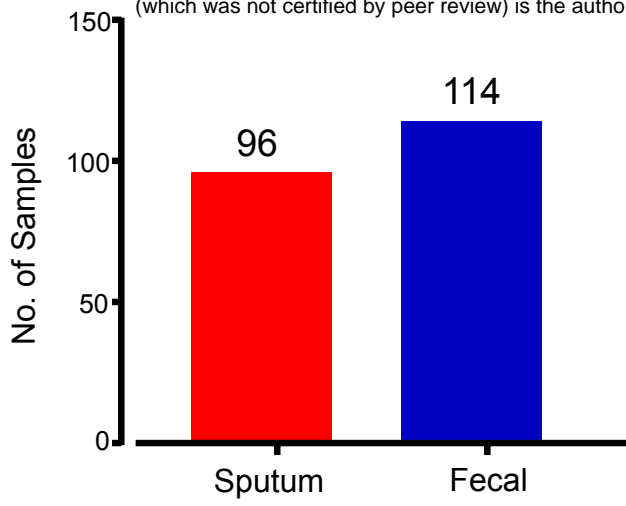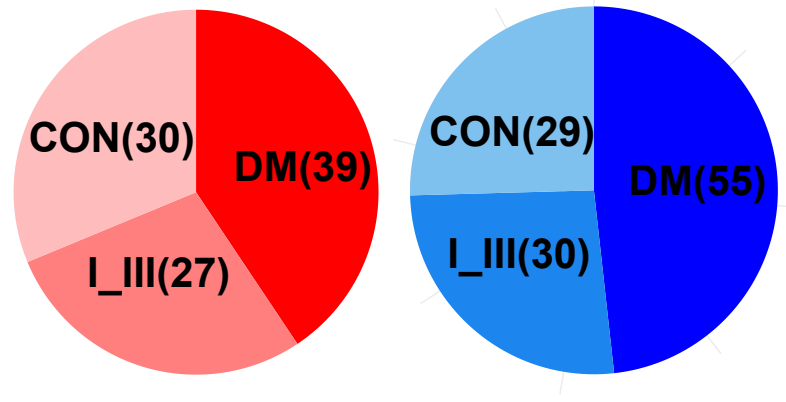

**B**

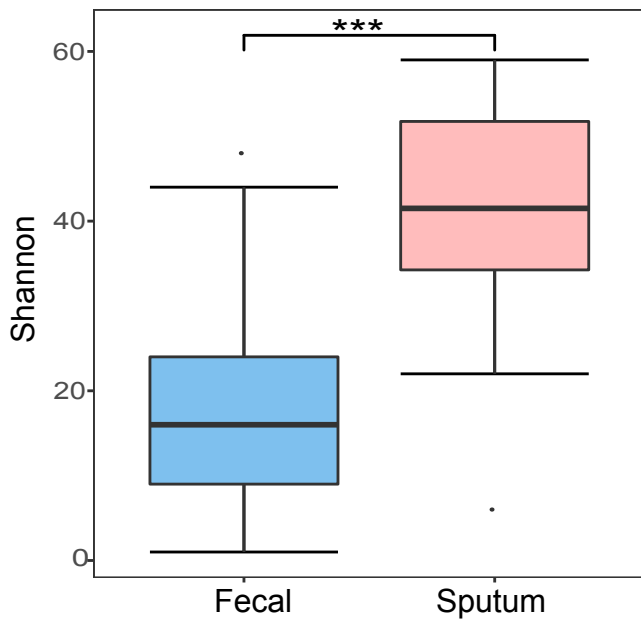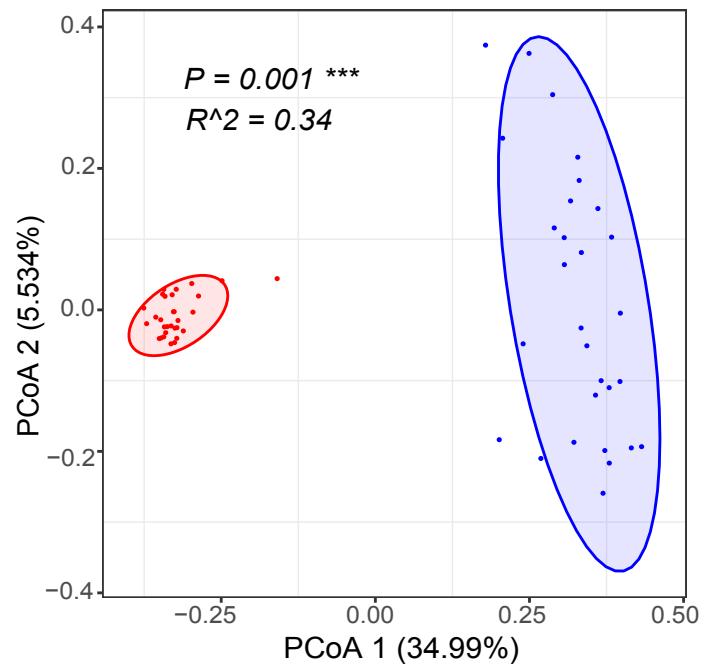

**C**

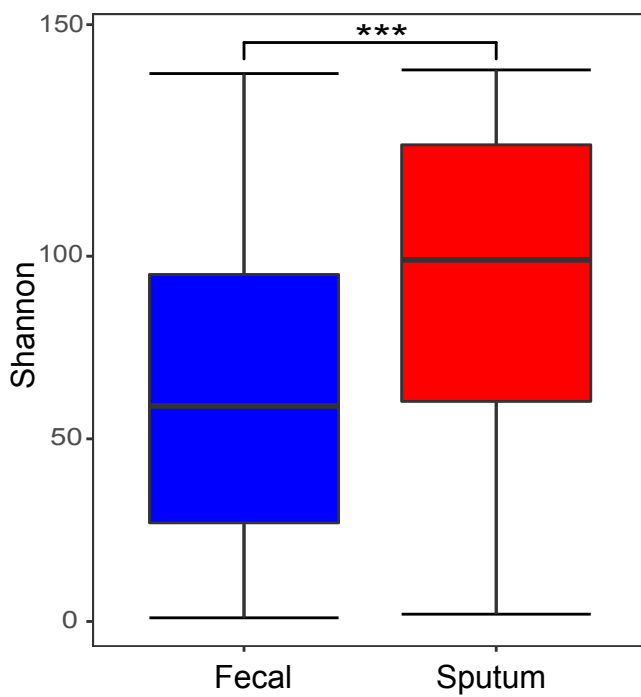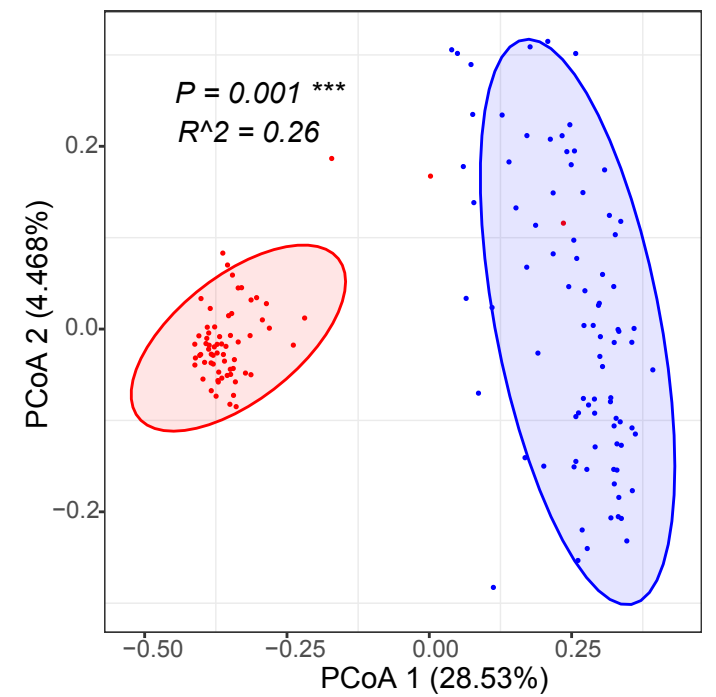

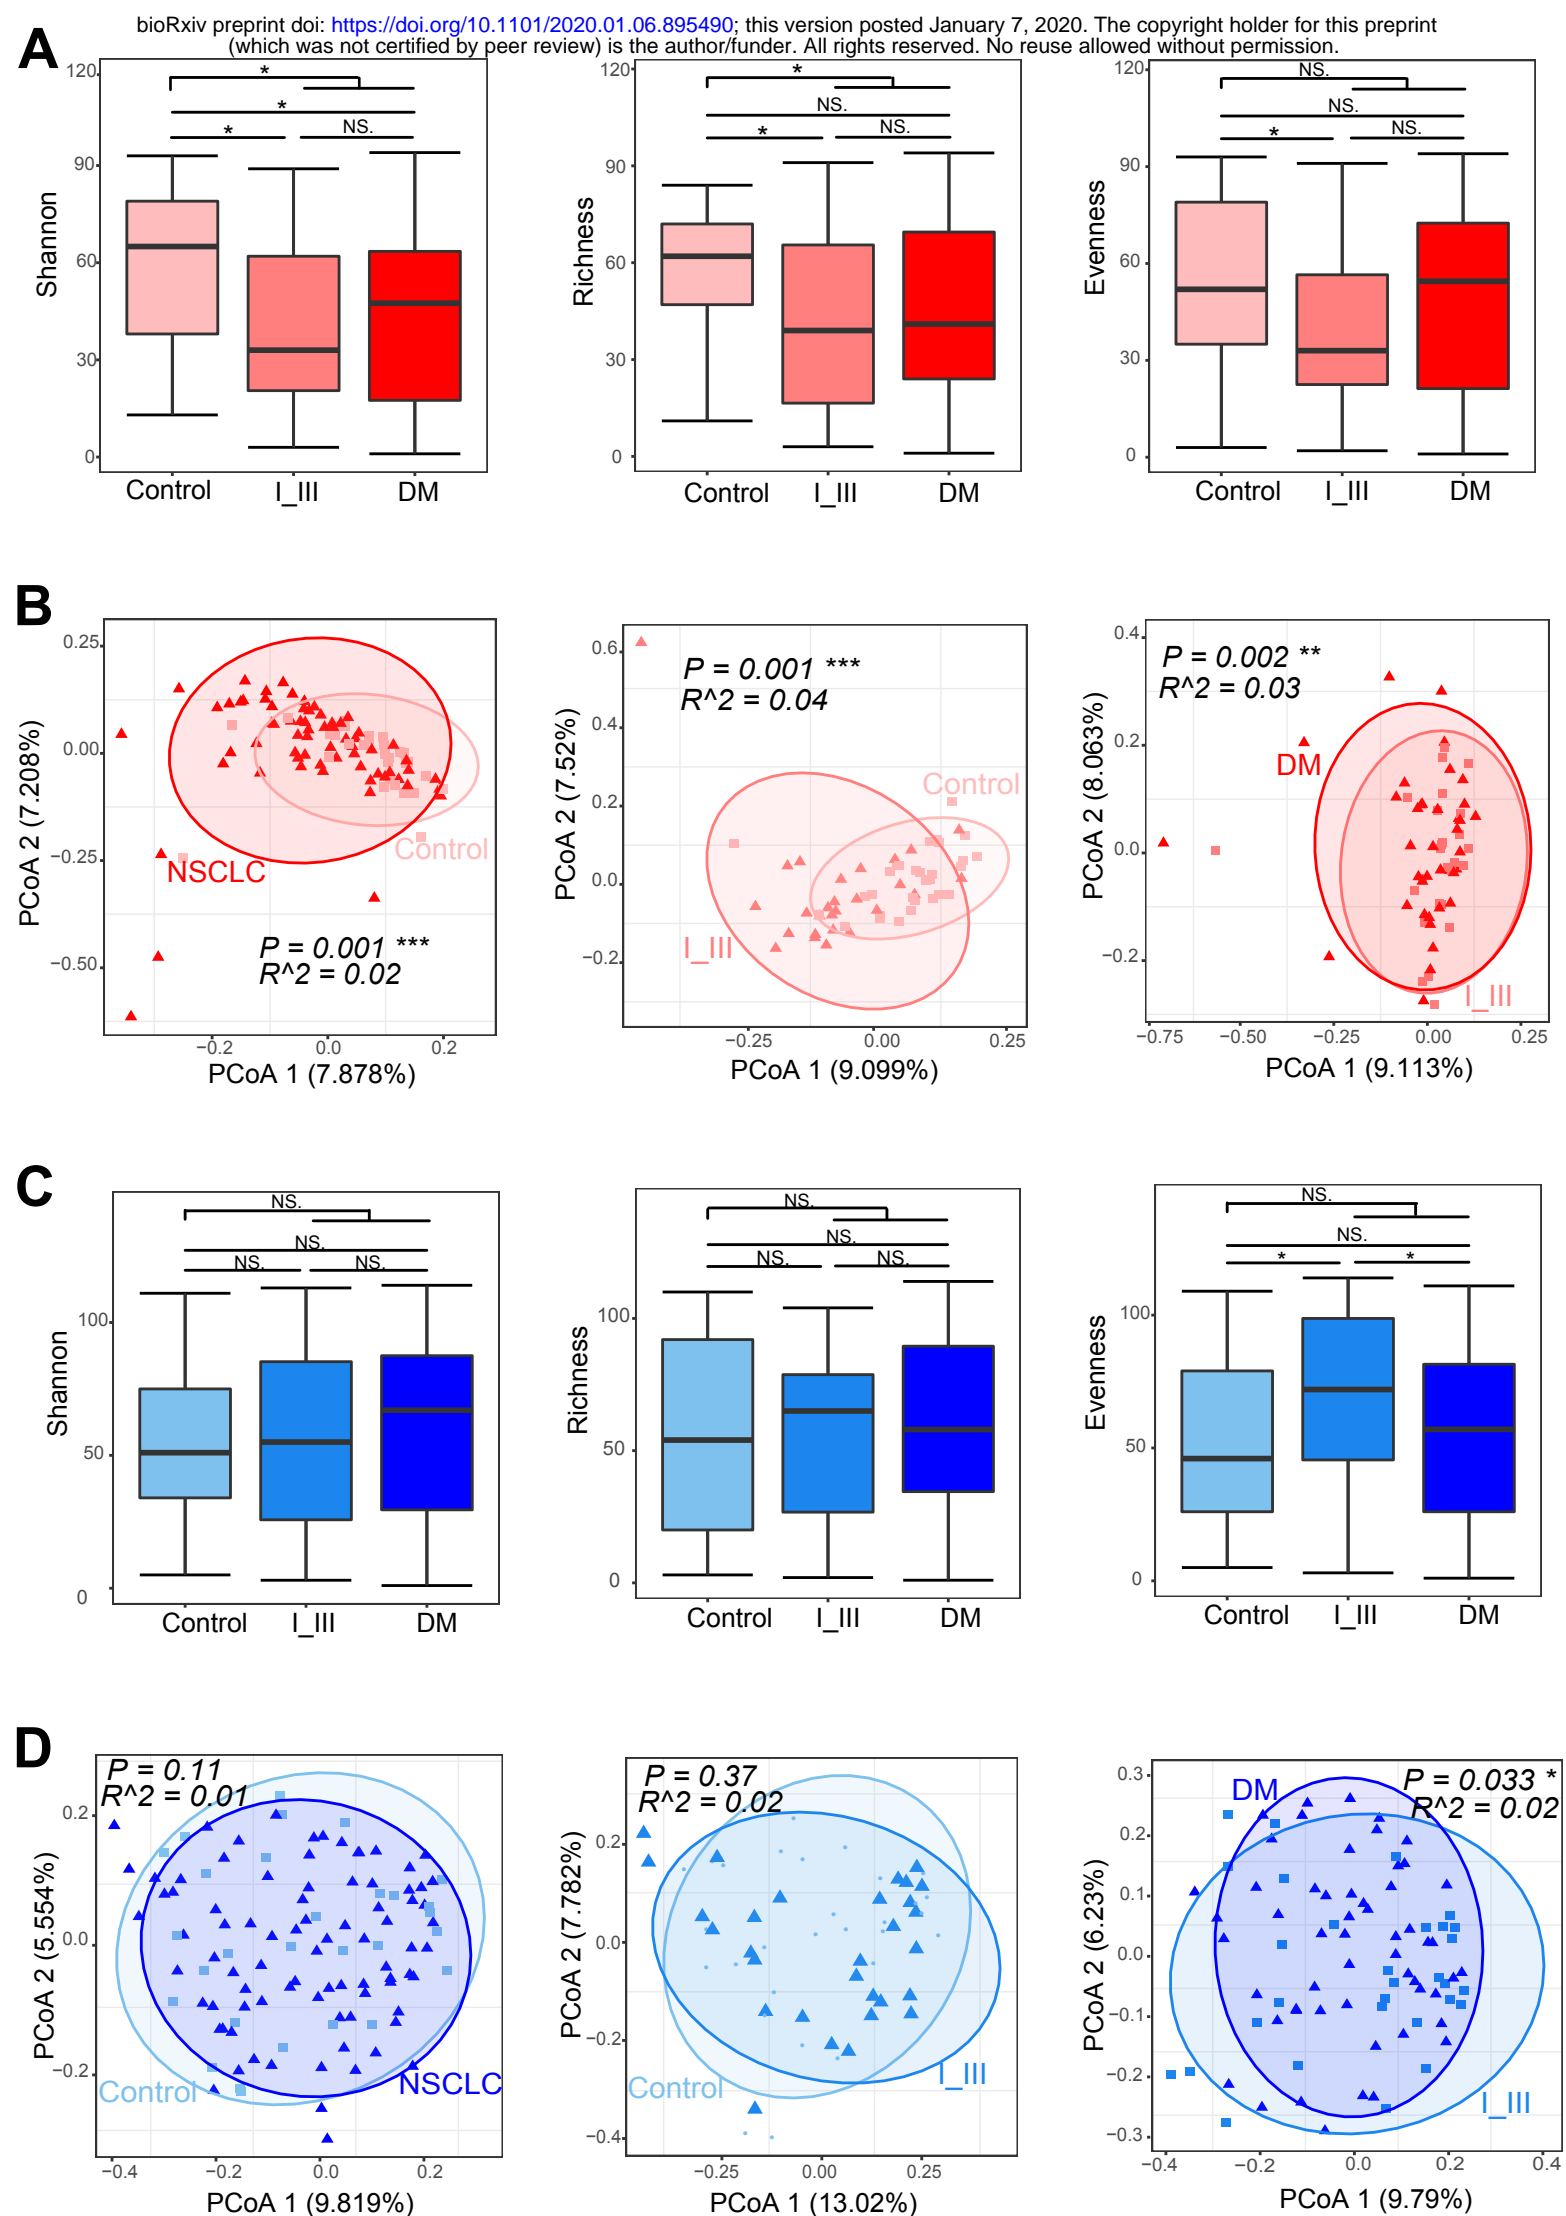

**A**

Control NSCLC

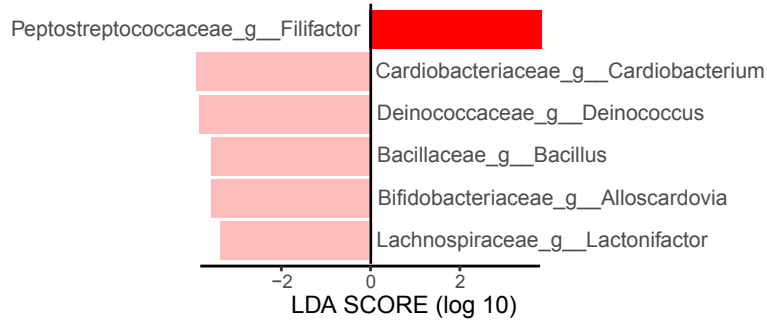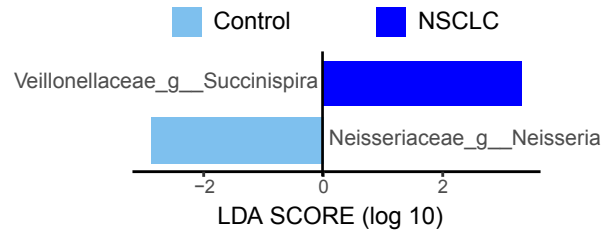

**B**

Control I\_III

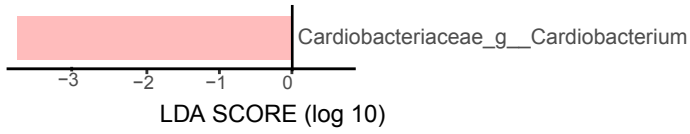

I\_III DM

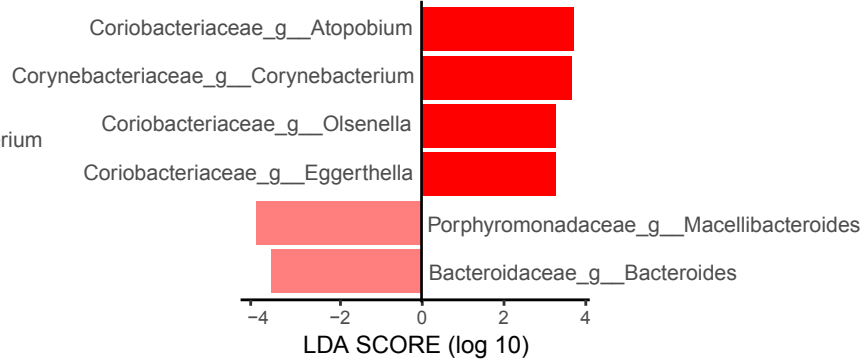

**C**

Control I\_III

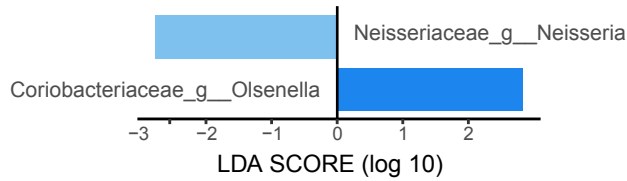

I\_III DM

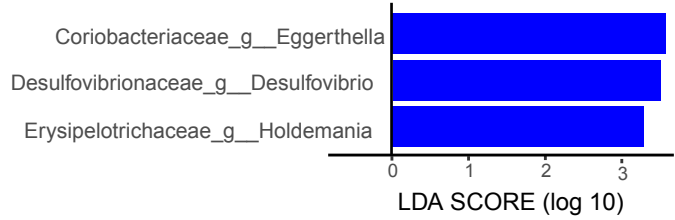



**A**

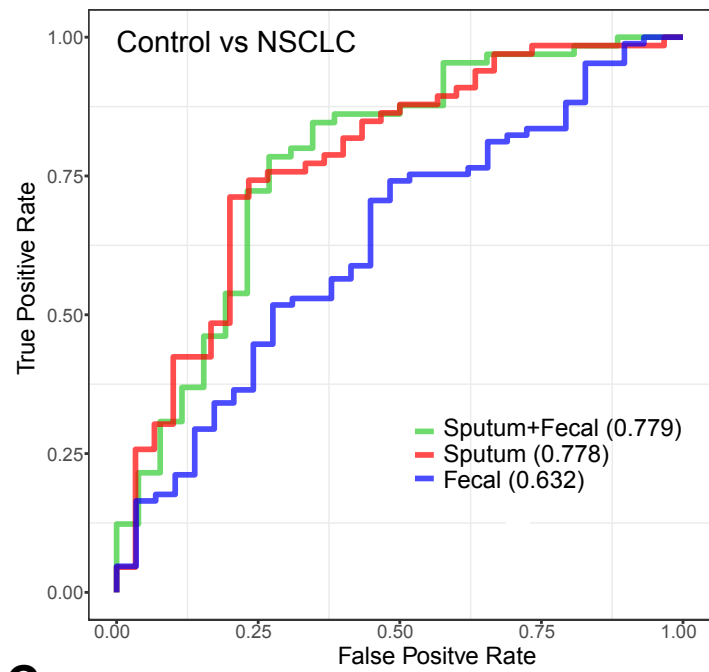

**B**

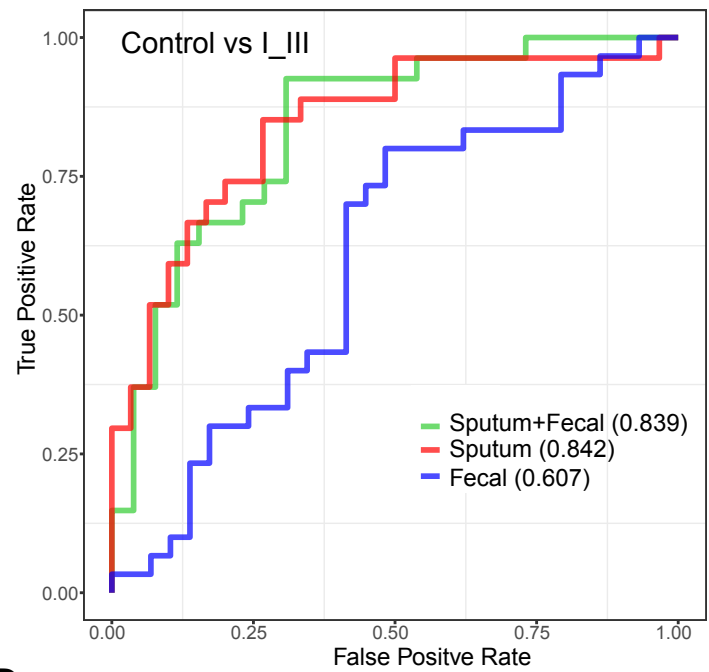

**C**

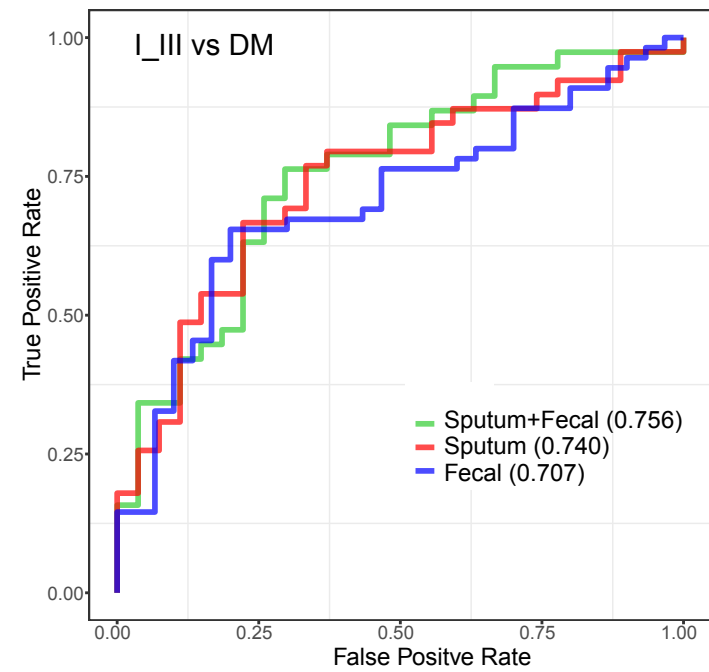

**D**

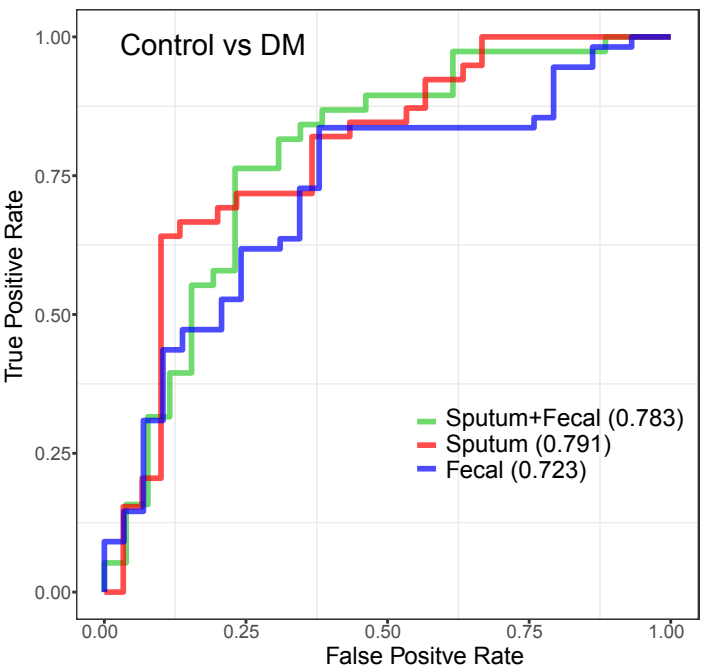

**E**

Control vs NSCLC mixed models

■ Sputum ■ Fecal

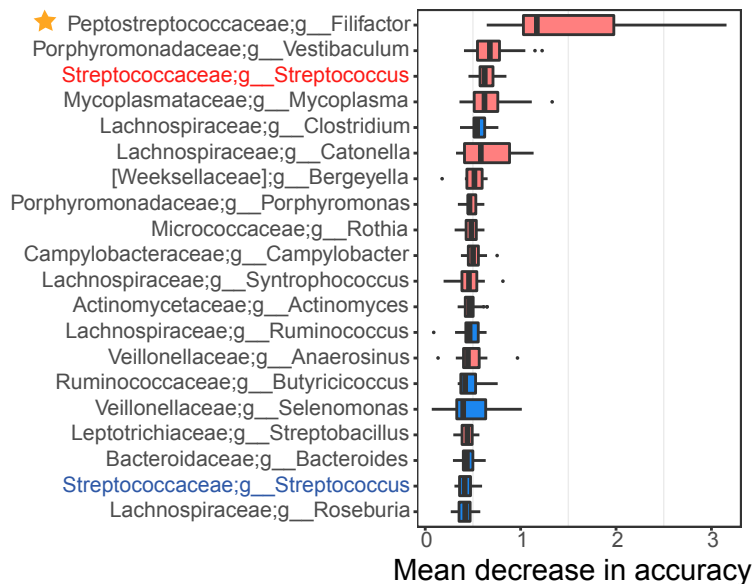

**F**

I\_III vs DM mixed models

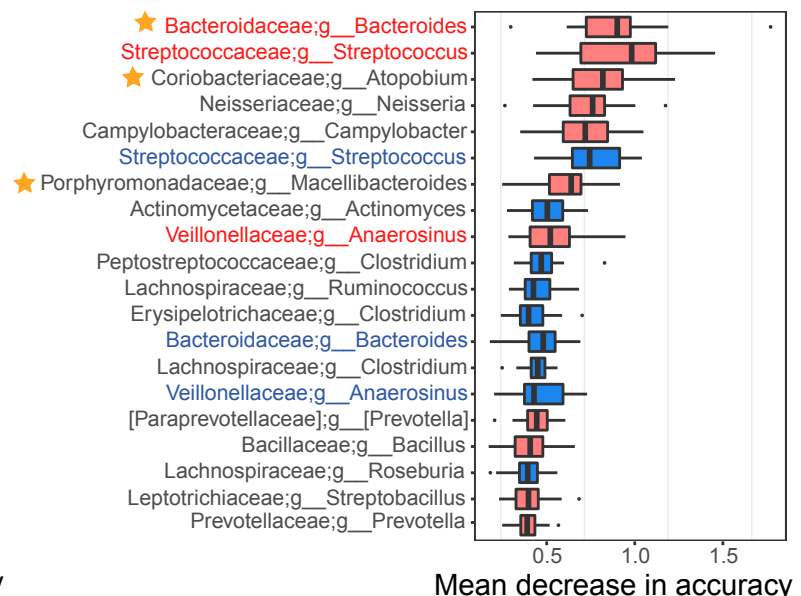

**A**

Control vs NSCLC

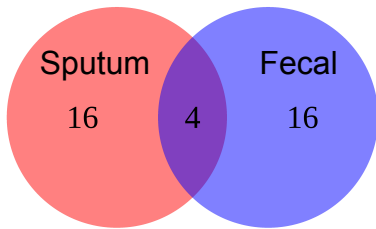

**B**

Control vs I\_III

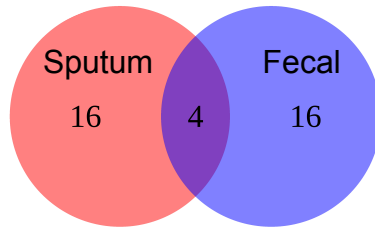

**C**

I\_III vs DM

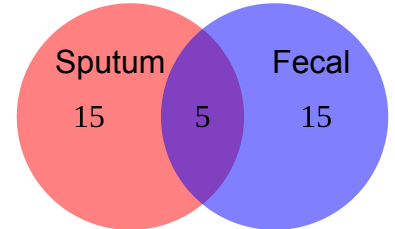

**D**

Control vs I\_III    I\_III vs DM

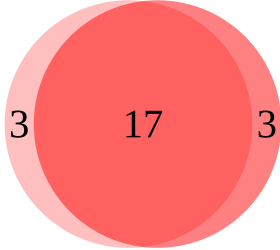

**E**

Control vs I\_III    I\_III vs DM

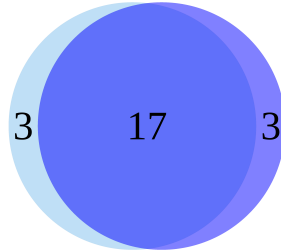

**A**

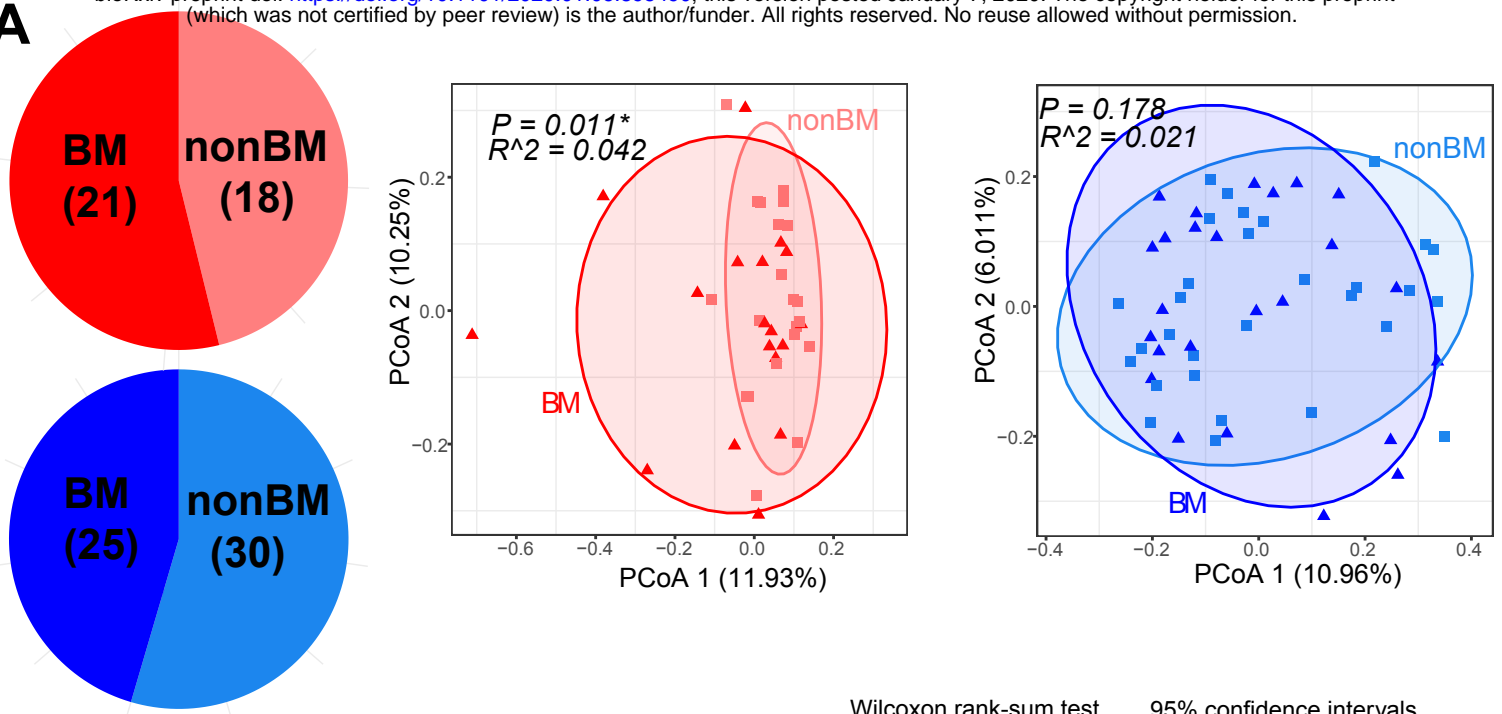

**B**

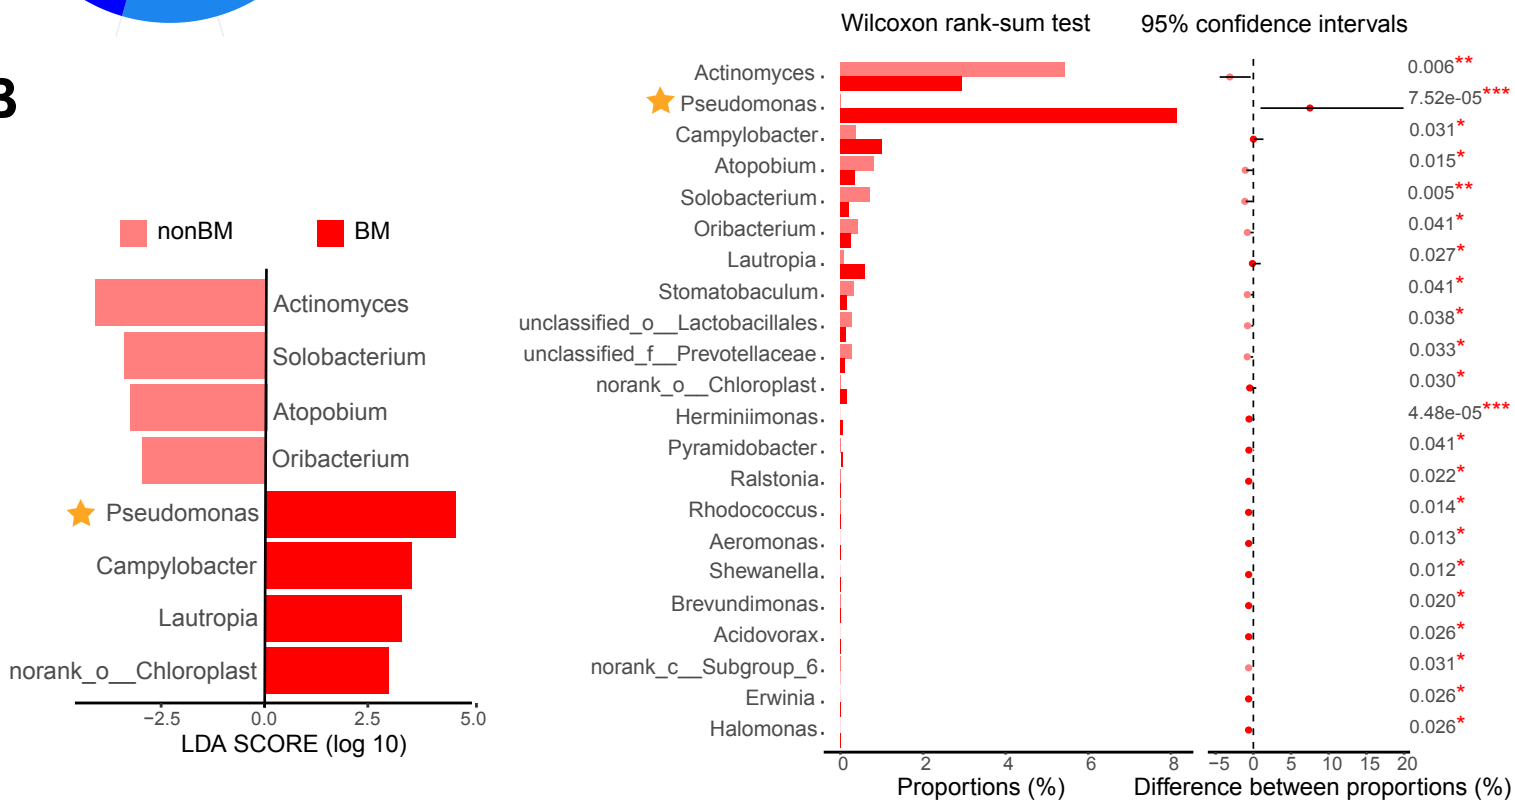

**C**

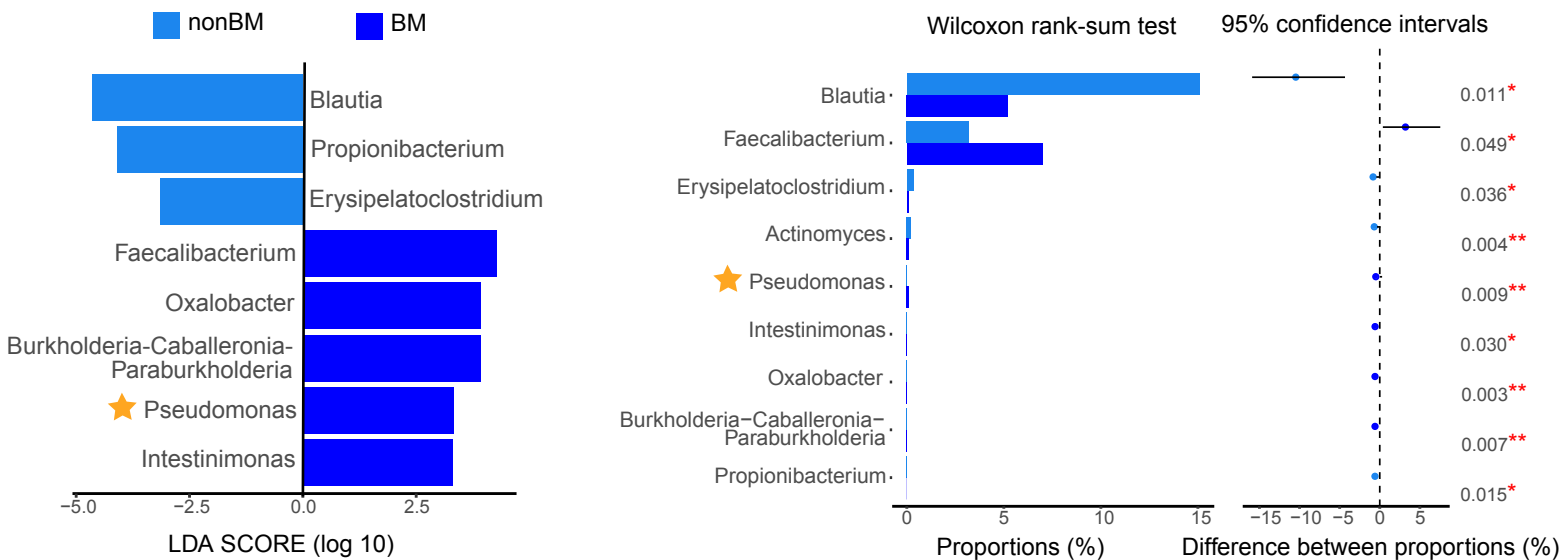

**A**

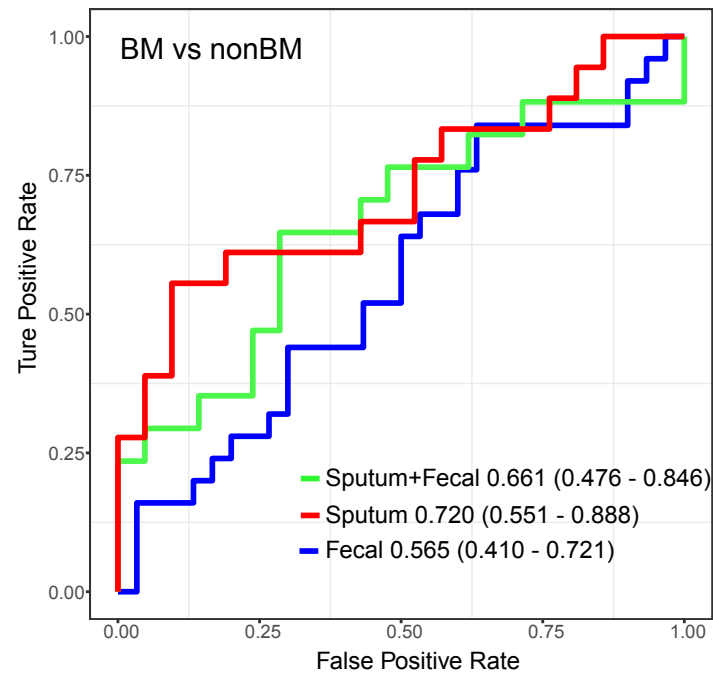

**B**

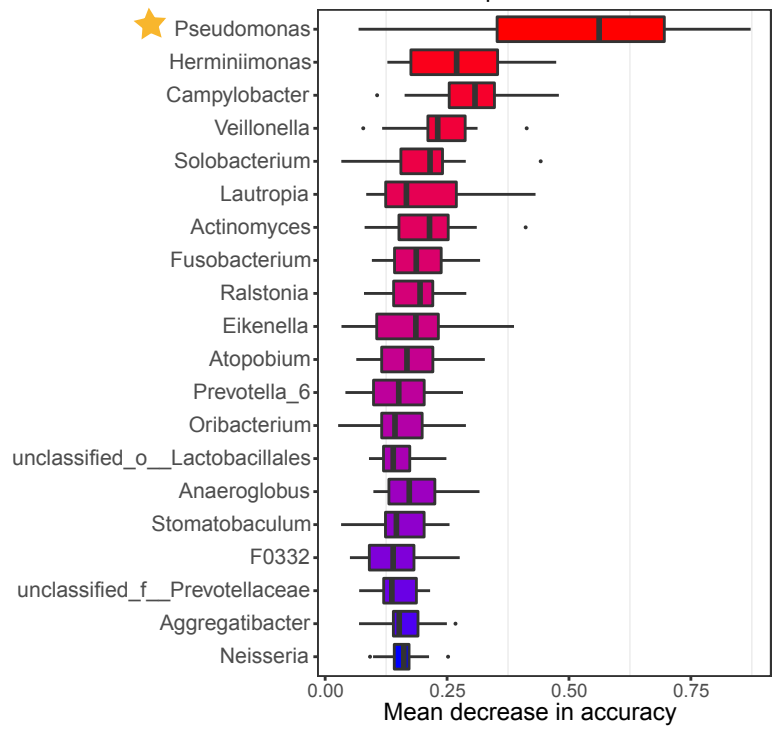

**A**

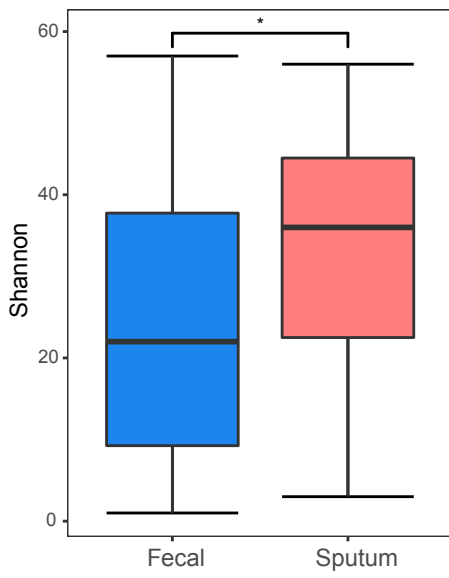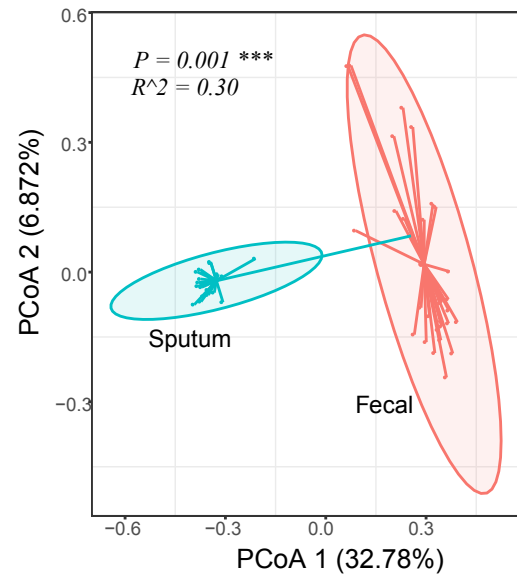

**B**

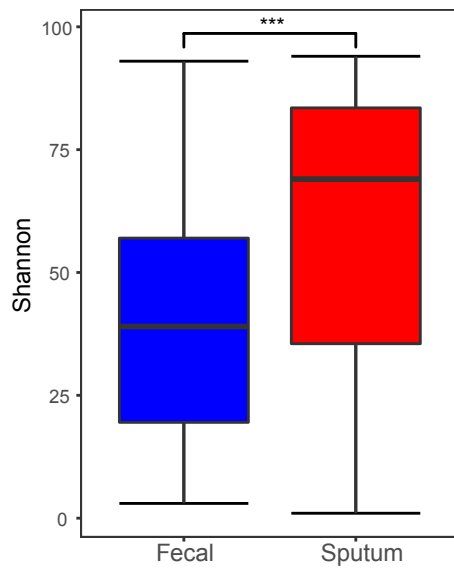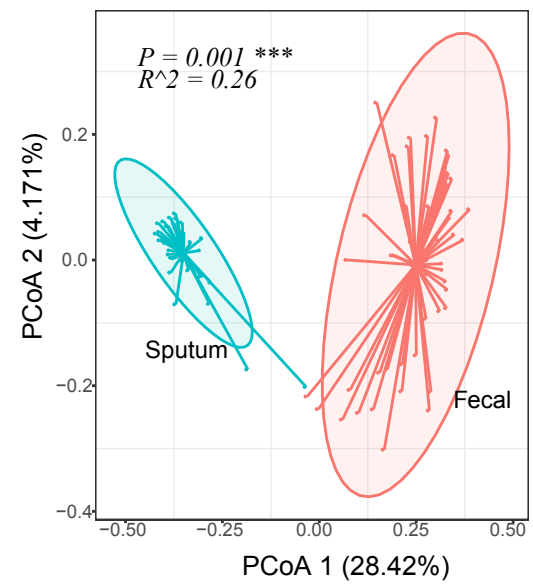

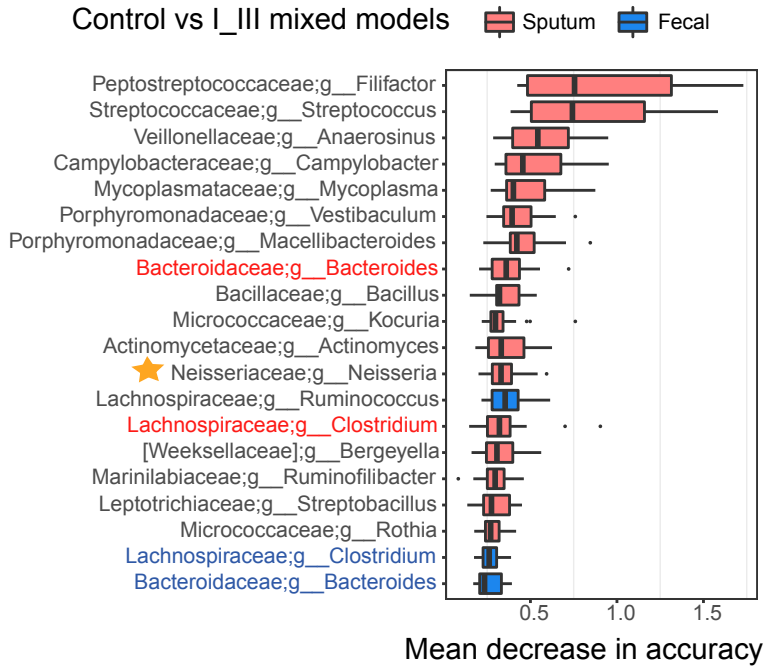

### BM vs nonBM mixed models

■ Sputum ■ Fecal

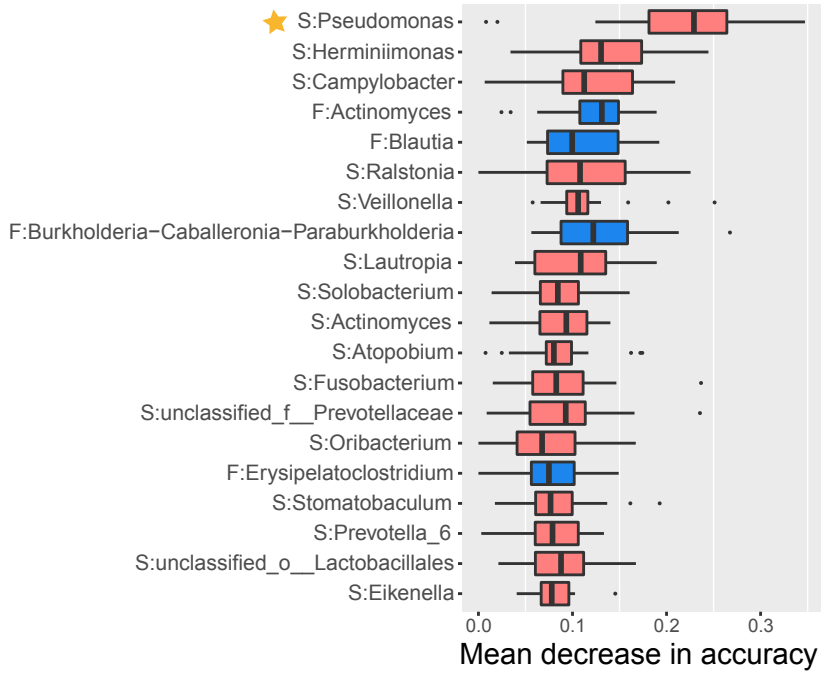

Source: https://biorxiv.org/content/biorxiv/early/2020/01/07/2020.01.06.895490.full-text.pdf
